# Supplementary material for: Prospective cohort study of mortality in very low birthweight infants in a single centre in the Eastern Cape province, South Africa
Source: PubMed Central journal article supplement — BMJ Paediatr Open. 2021 Feb 17;5(1):e000918. doi: 10.1136/bmjpo-2020-000918 (PMC7893654; doi:10.1136/bmjpo-2020-000918), 2021-02-17
Supplement: bmjpo-2020-000918.draft_revisions.pdf [file bmjpo-2020-000918.draft_revisions.pdf]

# BMJ Paediatrics Open

BMJ Paediatrics Open is committed to open peer review. As part of this commitment we make the peer review history of every article we publish publicly available.

When an article is published we post the peer reviewers' comments and the authors' responses online. We also post the versions of the paper that were used during peer review. These are the versions that the peer review comments apply to.

The versions of the paper that follow are the versions that were submitted during the peer review process. They are not the versions of record or the final published versions. They should not be cited or distributed as the published version of this manuscript.

BMJ Paediatrics Open is an open access journal and the full, final, typeset and author-corrected version of record of the manuscript is available on our site with no access controls, subscription charges or pay-per-view fees (<http://bmjpaedsopen.bmj.com>).

If you have any questions on BMJ Paediatrics Open's open peer review process please email [info.bmjpo@bmj.com](mailto:info.bmjpo@bmj.com)

# BMJ Paediatrics Open

## Prospective cohort study of mortality risk factors of very low birth weight infants in the Eastern Cape Province, South Africa.

|                               |                                                                                                                                                                                                                                                                                                                                                                                                                                                           |
|-------------------------------|-----------------------------------------------------------------------------------------------------------------------------------------------------------------------------------------------------------------------------------------------------------------------------------------------------------------------------------------------------------------------------------------------------------------------------------------------------------|
| Journal:                      | <i>BMJ Paediatrics Open</i>                                                                                                                                                                                                                                                                                                                                                                                                                               |
| Manuscript ID                 | bmjpo-2020-000918                                                                                                                                                                                                                                                                                                                                                                                                                                         |
| Article Type:                 | Original research                                                                                                                                                                                                                                                                                                                                                                                                                                         |
| Date Submitted by the Author: | 23-Oct-2020                                                                                                                                                                                                                                                                                                                                                                                                                                               |
| Complete List of Authors:     | Michaelis, Isabel; Walter Sisulu University, Paediatrics<br>Manyisane, Ncomeka; Walter Sisulu University, Paediatrics<br>Krägeloh-Mann, Ingeborg; Eberhard Karls University Tübingen Faculty of Medicine, Children's Hospital, Neuropaediatrics, Developmental Neurology, Social Paediatrics<br>Mazinu, Mikateko; South African Medical Research Council, Biostatistics unit<br>Jordaan, Esme; South African Medical Research Council, Biostatistics unit |
| Keywords:                     | Neonatology, Mortality                                                                                                                                                                                                                                                                                                                                                                                                                                    |
|                               |                                                                                                                                                                                                                                                                                                                                                                                                                                                           |

SCHOLARONE™  
Manuscripts

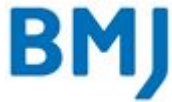

I, the Submitting Author has the right to grant and does grant on behalf of all authors of the Work (as defined in the below author licence), an exclusive licence and/or a non-exclusive licence for contributions from authors who are: i) UK Crown employees; ii) where BMJ has agreed a CC-BY licence shall apply, and/or iii) in accordance with the terms applicable for US Federal Government officers or employees acting as part of their official duties; on a worldwide, perpetual, irrevocable, royalty-free basis to BMJ Publishing Group Ltd ("BMJ") its licensees and where the relevant Journal is co-owned by BMJ to the co-owners of the Journal, to publish the Work in this journal and any other BMJ products and to exploit all rights, as set out in our [licence](#).

The Submitting Author accepts and understands that any supply made under these terms is made by BMJ to the Submitting Author unless you are acting as an employee on behalf of your employer or a postgraduate student of an affiliated institution which is paying any applicable article publishing charge ("APC") for Open Access articles. Where the Submitting Author wishes to make the Work available on an Open Access basis (and intends to pay the relevant APC), the terms of reuse of such Open Access shall be governed by a Creative Commons licence – details of these licences and which [Creative Commons](#) licence will apply to this Work are set out in our licence referred to above.

Other than as permitted in any relevant BMJ Author's Self Archiving Policies, I confirm this Work has not been accepted for publication elsewhere, is not being considered for publication elsewhere and does not duplicate material already published. I confirm all authors consent to publication of this Work and authorise the granting of this licence.

## Title Page

Mortality risk factors of Very Low Birth Weight infants at a tertiary hospital in the Eastern Cape, South Africa.

Isabel Michaelis, MD, PhD, Walter Sisulu University, East London

Ingeborg Krägeloh- Mann, Prof for Pediatrics, Eberhard Karls University of Tübingen, Tübingen

Ncomeka Manyisane, McBCh, FcPaed, Walter Sisulu University, East London

Mikateko Mazinu, MSc Biomathematics , South African Medical Research Council, Tygerberg

Esme Jordaan, MSc Statistics, African Medical Research Council, Tygerberg

Corresponding author: Isabel Michaelis, Private Bag 9047, Amalinda Main Road, 5200 East London, Tel: +27 (43) 709 2077, Fax: +27 (43) 709 4065. [isabel.michaelis@ehealth.gov.za](mailto:isabel.michaelis@ehealth.gov.za)

[Key words: neonatology, mortality risk factors, sub Saharan Africa, global health](#)

[Word count: 2512 words](#)

Possible reviewer:

Natasha Rhoda ([natasha.rhoda@uct.ac.za](mailto:natasha.rhoda@uct.ac.za))

Christian Gille: [christian.gille@med.uni-tuebingen.de](mailto:christian.gille@med.uni-tuebingen.de)

Dania Ballot: [Daynia.ballot@wits.ac.za](mailto:Daynia.ballot@wits.ac.za)

I hereby confirm, that the submitted paper or any parts of it have not been published or submitted anywhere else, nor been presented as an abstract or poster.

Dr Isabel Michaelis

1  
2  
3 Prospective cohort study of mortality risk factors of VLBW infants in the Eastern Cape, South  
4 Africa.  
5

6 Isabel Michaelis, MD, PhD, Walter Sisulu University, East London

7 Ingeborg Krägeloh-Mann, Prof for Pediatrics, Eberhard Karls University of Tübingen, Tübingen

8 Ncomeka Manyisane, McBCh, FcPaed, Walter Sisulu University, East London

9 Mikateko Mazinu, MSc Biomathematics, South African Medical Research Council, Tygerberg

10 Esme Jordaan, MSc Statistics, African Medical Research Council, Tygerberg

11  
12  
13  
14  
15  
16  
17 Contact: isabel.michaelis@echealth.gov.za

18  
19  
20 I hereby confirm, that the submitted paper or any parts of it have not been published or  
21 submitted anywhere else, nor been presented as an abstract or poster.  
22

23 There is no conflict of interest. This work was supported by the South African Medical  
24 Research Fund, grant number (086/2017). The sponsorship of the SAMRC Pilot Grant  
25 serves to encourage clinicians in rural South Africa to engage in research.  
26  
27

28  
29 Dr Isabel Michaelis contribution consisted of funding acquisition, study design, investigation,  
30 data curation, supervision and drafting the initial manuscript.  
31

32 Dr Ncomeka Mayisane contributed to study design, investigation, data curation and  
33 reviewing the manuscript.  
34

35 Prof Ingeborg Krägeloh-Mann contribution consisted of supervision and writing and  
36 reviewing the final manuscript.  
37

38 Mrs Mikateko Mazinu contribution consisted of data curation and data analysis.

39 Mrs Esme Jordaan contribution consisted of data curation and data analysis.  
40  
41  
42

### 43 **What is known about this topic?**

44 Neonatal mortality rate in South Africa is 32 % of the under five- year mortality rate.

45 Preterm and very low birth weight babies are most affected.

46 Studies about neonatal mortality have been done in the main cities in South Africa.  
47  
48  
49  
50  
51  
52  
53

### 54 **What does this study add?**

55 To our knowledge this is the first prospective study about the mortality rate and mortality risk  
56 factors of VLBW infants in the Eastern Cape of South Africa.  
57

58 It shows that the chance of survival for those babies is lower than in other urban settings.  
59  
60

1  
2  
3 Equipment, facilities, skills and staffing should be improved in those settings.  
4  
5  
6  
7  
8  
9  
10  
11  
12  
13  
14  
15  
16  
17  
18  
19  
20  
21  
22  
23  
24  
25  
26  
27  
28  
29  
30  
31  
32  
33  
34  
35  
36  
37  
38  
39  
40  
41  
42  
43  
44  
45  
46  
47  
48  
49  
50  
51  
52  
53  
54  
55  
56  
57  
58  
59  
60

Confidential: For Review Only

**Background:**

Neonatal mortality is worldwide a major contributor to the number of deaths in children under 5 years of age. The primary objective of this study was to assess the overall mortality rate of babies with a birth weight of less than 1501 g in a neonatal unit at a tertiary hospital in the Eastern Cape Province, South Africa. Furthermore, different maternal and offspring related risk factors for mortality were analysed.

**Methods:**

This is a prospective cohort study which included babies admitted to the neonatal wards of the hospital within their first 24 hours of life and with a birth weight below 1501 g.

**Results:**

173 infants were admitted to the neonatal department with a birth weight below 1501g. The overall survival rate to hospital discharge was 68%. Only 46.5% of babies born with a birth weight below 1001 g survived their hospital stay.

Main predictors for survival were higher gestational age and higher birth weight. Need for ventilator support and sepsis increased mortality risk significantly, as did maternal factors such as HIV infection or teenage age. Babies born to a mother with gestational hypertension had a two-fold increased chance of survival.

**Conclusion:**

This is the first prospective study looking at survival of very low birth weight babies in the underprivileged part of the Eastern Cape of South Africa. Compared to better resourced public hospitals in the country the survival rate remains unacceptably low. More needs to be done to prevent preterm and low birth weight births; the facilities caring for these most vulnerable persons must be equipped and staffed accordingly.

## Introduction:

Despite improved survival rates of neonates worldwide, the survival of preterm and low birth weight babies is still challenging, especially in middle and low-income countries (1–4).

In 2018 the WHO described a worldwide increase of babies born prematurely over the last two decades. The incidence has been estimated between 5–18% (5,6). The rate of babies born with a very low birth weight (VLBW) varied between different countries, for example it has been found to be 3% in South Africa, while in the USA it is between 1.23 and 1.43% (7–9). Furthermore, prematurity and low birth weight have been identified as the leading causes of mortality in children less than five years of age (5,10–12). It is also well known that neonatal mortality varies considerably amongst high and low-middle income countries for example, a mortality rate of 15% in the United States, while India reports 24.6% for VLBW infants (13,14).

In South Africa, neonatal mortality accounted for 32% of the under-5 mortality rate (4,15,16). Kalimba and Ballot (17) studied the survival rate of extremely low birth weight (ELBW) babies (babies weighing less than 1000g at birth) born between 2006 and 2010 in Johannesburg and found that only 25.6% of babies born with a birth weight of less than 900g survived their hospital stay, with birth weight and gestational age being the strongest predictors for survival. A newer retrospective cross sectional South African study found an overall survival rate in VLBW babies (500g–1499 g) of 75.7% (18).

However, there are other known contributory factors, which can be divided into offspring or maternal related risk factors. Examples of baby related risk factors studied in the literature are low Apgar scores, respiratory distress syndrome, intubation and mechanical ventilation, sepsis and hemodynamic instability (Terzic and Heljic, 2012; Kabilan and Kumar, 2018). Maternal or obstetric risk factors include eclampsia, alcohol consumption, smoking, low socioeconomic status, scarce antenatal care and human immunodeficiency virus (HIV) infection (17,21–23). Several studies suggest an increased risk for premature labour in mothers taking antiretroviral treatment for HIV infection during pregnancy (24–27), while others did not find a relationship (28). This is of note, as 30.8% of pregnant women in South Africa in 2015 tested positive for HIV infection, and are put on treatment as soon as the infection is diagnosed (Department of Health Republic of South Africa, 2017).



**Setting:**

Frere Hospital is a public tertiary hospital in East London in the Eastern Cape Province in South Africa, with a seven bed paediatric intensive care unit (PICU), which cares for neonates, paediatric medical and surgical patients. Because of this very limited PICU access, babies with a weight below 1000 g are not provided with invasive ventilatory support. These babies will receive surfactant if needed and continuous positive airway pressure (CPAP) ventilation is available for six infants in the high care neonatal unit. Stable neonates with a weight >1000 g are referred to the general nursery ward, where they receive kangaroo care (KMC) in the ward and, if necessary, intravenous fluids and/or antibiotics and oxygen. Once clinically stable, off oxygen support, tolerating full enteral feeds and weighing more than 1500 g, infants will be transferred to the KMC ward until mothers are competent in caring for their baby and the weight has increased to at least 1700 g.

Frere Hospital is the tertiary neonatal and obstetric referral centre for obstetric units and for surrounding district hospitals in the remote part of the Eastern Cape Province. These areas were deprived from adequate infrastructure during the Apartheid regime and are still one of most underprivileged parts of South Africa.

**Materials and Methods:**

This was a prospective cohort study. All babies born at, or admitted within the first 24 hours of life into the neonatal unit with a birth weight equal or below 1500 g and without any life-threatening malformations were included (n=173). The recruitment period lasted from December 2017 to November 2018. During this period 4207 babies were born at Frere Hospital obstetric department.

After obtaining the approval of the institutional ethics committee (086/2017) and after receiving written consent from the mother of the baby, data concerning mother and child during the pre-, peri- and neonatal period were collected from the maternal and neonatal case sheets, as well as from a questionnaire filled in with the mother (available as supplements). The babies were followed up until discharge or death. All babies received standard care during this period, as outlined above.

**Patient and Public Involvement:**

Infants born with a very low birth weight are followed up in a high risk clinic and often have to be referred to a neurodevelopmental clinic for assessment. During these follow-up

1  
2  
3 appointments the necessity for the check-ups is often questioned and if pathologies are  
4 found the possible causes for those lie mostly in the perinatal and admission history. Being  
5 able to answer those questions for our setting a study involving the postnatal admission stay  
6 needed to be scrutinized. The patients, being mother-newborns pair, were not involved in the  
7 study design. While doing the study and recruiting every new-born being admitted in our  
8 wards with a birth weight below or equal to 1500g was assessed for inclusion in our study,  
9 no recruitment from there side was necessary.  
10  
11  
12  
13

14  
15 The results of this study will be verbally communicated to the mothers during the follow-up  
16 appointments.  
17

### 18 **Statistical analysis:**

19  
20 Demographic data is presented as frequencies (percentages) for categorical data, and as  
21 means (SD) for numerical data. To test for association between the outcome variable  
22 (mortality) and the predictor variables, a log binomial regression model was used. Multiple  
23 regression analysis was performed for all significant variable from the baby and mother's  
24 univariate analysis separately. A stepwise regression was used to exclude non-significant  
25 variables one at a time. The standard for significance for all analyses was  $p < 0.05$ . Data were  
26 analysed using STATA version 15.  
27  
28  
29  
30  
31

### 32 **Offspring and Maternal multiple regression analysis:**

33  
34 These analyses include all variables with  $p$  value  $\leq 0.1$  from the baby univariate analysis  
35 table. All variables with small cell number ( $n \leq 6$ ) were excluded from the multiple regression  
36 model. Apgar at 5 minutes was also excluded in the analysis due to colinear relationship  
37 between Apgar 1 and Apgar 5.  
38  
39  
40  
41  
42  
43

### 44 **Results:**

45  
46 One hundred and sixty-one VLBW infants were recruited during the study period, of those 45  
47 (28.0%) died before discharge and 116 (72.0%) were discharged home. All 116 babies  
48 discharged home from Frere Hospital received a follow up date for the high-risk clinic (Figure  
49 1).  
50  
51  
52  
53  
54

### 55 **Demographics:**

56  
57 Of the 161 babies included in the study, 96 were female (59.7%) and 65 were male (40.3%).  
58 The mean birth weight was 1156 g (580 g – 1 500 g) with SD of 233 g. Almost three quarters  
59 (73.4%) of the babies had a birth weight above 1000 g. The mean gestational age in weeks  
60

was 32.2 with SD of 2.6 weeks. About half were born at the gestational age of 26–32 weeks (n=78; 49.1%). Most babies were delivered by normal vaginal delivery (n=97; 60.3%), to a mother who was unemployed (n=135; 84.9%). More than a third of the babies (n=58; 36.0%) were HIV exposed during pregnancy and birth. Almost all HIV exposed babies tested negative for HIV infection at birth with a negative birth HIV-polymerase chain reaction (HIV-PCR) (n=55; 94.8%). Three babies, who died a few hours after birth, did not receive an HIV-PCR at birth and their status is therefore unknown. 146 (91.8%) of the babies were exclusively breastfed, nine were exclusively formula fed and four received mixed feeding.

The maternal age ranged between 14 and 46 years, with a mean maternal age of 27 years (SD = 6.7). Eighteen percent of the mothers were teenagers (n=30). Only 13 (8.2%) of the mothers were married, 78 (48.5%) were in a stable relationship and 67 (41.6%) mothers were single. For 3 (1.9%) mothers, no such information was available. Less than half (45.6%) of the mothers attended no or primary school only, while 54.4% went through secondary or tertiary education. Almost 90% (89.9%) of the mothers lived in a house which had electricity, but only 62.3% had running water on their property. Fifty-eight (36.0%) mothers had HIV infection diagnosed before, during pregnancy, or at birth. Thirty-nine of them (67.2%) had been on antiretroviral (ARV) treatment at delivery for more than 4 weeks. Sixteen (27.6%) mothers had been on ARV treatment for less than 4 weeks or were not on treatment at all when giving birth, and their babies were thus considered at high risk for HIV transmission and treated accordingly.

The in-hospital survival rate for all babies born with a birth weight below 1500 g and admitted to our neonatal wards was 118/173 (68.2%), and for the babies included in our study the survival rate was 116/161 (72.0%).

### **Risk factors for in hospital mortality:**

Neonatal related risk factors:

Univariate regression analysis was used to examine the association between the outcome death and individual risk factors. The significant risk factors were low gestational age (p<0.0001; RR=4.2; 95% CI: 2.9–5.9), the need for resuscitation at birth (p< 0.0001; RR=4.5; 95% CI: 3.4–5.8) or during hospital stay (p=0.011; RR=12; 95% CI: 5.8–25.9), low 1 and/or 5 minute Apgar score (p≤0.0001; RR=2.5; 95% CI: 2.0–3.1 and p<0.0001; RR=2.4; 95% CI: 2.1–2.8), and sepsis (p<0.0001; RR=6.4; 95% CI: 3.8–10.9) were significantly associated with death (table 1). Male gender was not associated with higher mortality risk (p=0.935; RR=1.0; 95% CI: 0.7–1.5) (table 1).

Table 1: Univariate analysis of risk factors associated with mortality in VLBW infants

| Description                    | category    | n*  | %*    | n died** | %died** | SE   | P     | RR   | 95%CI |       |
|--------------------------------|-------------|-----|-------|----------|---------|------|-------|------|-------|-------|
| GA (weeks)                     | 25-32 wks   | 78  | 49,06 | 36       | 46,2    | 3,28 |       |      |       |       |
|                                | 33-37 wks   | 81  | 50,94 | 9        | 11,1    | 1,64 | 0,000 | 4,2  | 2,93  | 5,88  |
| HIV exposed                    | no (0)      | 103 | 63,98 | 31       | 30,1    | 2,11 |       | 1,2  | 1,00  | 1,56  |
|                                | yes (1)     | 58  | 36,02 | 14       | 24,1    | 2,42 | 0,053 |      |       |       |
| birth weight                   | >1000g (0)  | 118 | 73,29 | 22       | 18,6    | 2,31 |       | 2,9  | 2,08  | 3,96  |
|                                | <=1000g (1) | 43  | 26,71 | 23       | 53,5    | 3,73 | 0,000 |      |       |       |
| Resuscitation at birth         | no (0)      | 89  | 55,97 | 10       | 11,2    | 1,53 |       |      |       |       |
|                                | yes (1)     | 70  | 44,03 | 35       | 50      | 2,09 | 0,000 | 4,5  | 3,43  | 5,78  |
| Apgar 1 min                    | 7-10 (=0)   | 110 | 68,32 | 21       | 19,1    | 1,77 |       |      |       |       |
|                                | 0-6 (=1)    | 51  | 31,68 | 24       | 47,1    | 2,23 | 0,000 | 2,5  | 1,99  | 3,05  |
| Apgar 5 min.                   | 7-10(=0)    | 144 | 89,44 | 35       | 24,3    | 1,66 |       |      |       |       |
|                                | 0-6(=1)     | 17  | 10,56 | 10       | 58,8    |      | 0,000 | 2,4  | 2,12  | 2,77  |
| HMD                            | no (0)      | 85  | 52,8  | 16       | 18,8    | 1,50 |       |      |       |       |
|                                | yes (1)     | 76  | 47,2  | 29       | 38,2    | 3,03 | 0,000 | 2,0  | 1,72  | 2,38  |
| Other                          | no (0)      | 131 | 81,37 | 33       | 25,2    | 1,73 |       |      |       |       |
|                                | yes (1)     | 30  | 18,63 | 12       | 40      | 5,07 | 0,001 | 1,6  | 1,20  | 2,09  |
| Oxygen support                 | no (0)      | 50  | 31,06 | 2        | 4       | 0,63 |       |      |       |       |
|                                | yes (1)     | 111 | 68,94 | 43       | 38,7    | 2,42 | 0,000 | 9,7  | 7,39  | 12,68 |
| Surfactant given               | no (0)      | 107 | 66,46 | 16       | 15      | 1,80 |       |      |       |       |
|                                | yes (1)     | 54  | 33,54 | 29       | 53,7    | 2,49 | 0,000 | 3,6  | 2,77  | 4,65  |
| Weight gain                    | no          | 85  | 64,89 | 6        | 7,1     | 1,12 |       |      |       |       |
|                                | yes         | 46  | 35,11 | 11       | 23,9    | 3,60 | 0,000 | 3,4  | 2,21  | 5,19  |
| Sepsis                         | no (0)      | 69  | 46,94 | 4        | 5,8     | 1,21 |       |      |       |       |
|                                | yes (1)     | 78  | 53,06 | 29       | 37,2    | 3,17 | 0,000 | 6,4  | 3,78  | 10,88 |
| ICH                            | no (0)      | 120 | 88,24 | 13       | 10,8    | 1,33 |       |      |       |       |
|                                | yes (1)     | 16  | 11,76 | 9        | 56,3    | 9,83 | 0,000 | 5,2  | 3,03  | 8,90  |
| PDA                            | no (0)      | 104 | 77,04 | 19       | 18,3    | 2,06 | 0,002 | 2,8  | 1,47  | 5,47  |
|                                | yes (1)     | 31  | 22,96 | 2        | 6,5     | 1,67 |       |      |       |       |
| Resuscitation during admission | no (0)      | 112 | 74,17 | 7        | 6,3     | 2,45 |       |      |       |       |
|                                | yes (1)     | 39  | 25,83 | 30       | 76,9    | 2,12 | 0,011 | 12,3 | 5,85  | 25,88 |
| Gender                         | male (0)    | 65  | 40,37 | 18       | 27,7    | 3,74 |       |      |       |       |
|                                | female (1)  | 96  | 59,63 | 27       | 28,1    | 2,59 | 0,935 | 1,0  | 0,7   | 1,5   |
| Born before arrival            | no (0)      | 150 | 93,17 | 43       | 28,7    | 1,77 |       |      |       |       |
|                                | yes (1)     | 11  | 6,83  | 2        | 18,2    | 7,36 | 0,278 | 0,6  | 0,28  | 1,45  |
| Mom not been to ANC            | no (0)      | 136 | 84,47 | 37       | 27,2    | 1,97 |       |      |       |       |
|                                | yes (1)     | 25  | 15,53 | 8        | 32      | 3,40 | 0,218 | 1,2  | 0,91  | 1,52  |

\*The number and percentage per risk factor category

\*\*The number and percentage of babies who died per risk factor category  
SE standard error from the model

RR relative risk with 95% confidence interval

GA: gestational age, HIV: human immunodeficiency virus, HMD: hyaline membrane disease, ICH: intracranial haemorrhage, PDA: persistent ductus arteriosus, ANC: antenatal clinic.

### Maternal risk factors for the univariate model:

The risk of dying while still in hospital was higher in babies of teenage mothers ( $p=0.004$ ;  $RR=1.2$ ; 95% CI: 1.1–1.5) and if there was no refrigerator in the house the mother lived in ( $p=0.038$ ;  $RR=1.2$ ; CI: 1.01–1.48). Maternal hypertension ( $RR=0.6$ ; 95% CI: 0.5–0.8;  $p=0.0001$ ) and preeclampsia ( $RR=0.7$ ; 95% CI: 0.6–0.8;  $p=0.0001$ ) significantly decreased the mortality risk in the babies. Education level of the mother and other socio-economic status factors were not related to a higher mortality risk during admission in our study (table 2).

Table 2. The univariate associations between mortality and maternal related risk factors.

| Description           | Codes           | n   | %     | n died | %died | P     | RR  | 95%CI |      |
|-----------------------|-----------------|-----|-------|--------|-------|-------|-----|-------|------|
| Age of mother (years) | <=20yrs         | 30  | 18,63 | 10     | 33,3  | 0,004 | 1,2 | 1,07  | 1,45 |
|                       | >20yrs          | 131 | 81,37 | 35     | 26,7  |       |     |       |      |
| Marital status        | marr /stale rel | 13  | 16,25 | 3      | 23,1  |       |     |       |      |
|                       | no partner      | 67  | 83,75 | 18     | 26,9  | 0,574 | 1,2 | 0,69  | 1,98 |
| Substance abuse       | no(0)           | 147 | 91,88 | 40     | 27,2  |       |     |       |      |
|                       | yes(1)          | 13  | 8,13  | 4      | 30,8  | 0,761 | 1,1 | 0,51  | 2,50 |
| Hypertension          | no(0)           | 91  | 57,96 | 29     | 31,9  |       |     |       |      |
|                       | yes(1)          | 66  | 42,04 | 13     | 19,7  | 0,000 | 0,6 | 0,49  | 0,77 |
| PROM                  | no(0)           | 134 | 85,35 | 35     | 26,1  |       |     |       |      |
|                       | yes(1)          | 23  | 14,65 | 7      | 30,4  | 0,602 | 1,2 | 0,66  | 2,07 |
| Pre-eclampsia         | no(0)           | 117 | 74,52 | 34     | 29,1  |       |     |       |      |
|                       | yes(1)          | 40  | 25,48 | 8      | 20    | 0,00  | 0,7 | 0,57  | 0,82 |
| Other illnesses       | no(0)           | 125 | 79,11 | 31     | 24,8  |       |     |       |      |
|                       | yes(1)          | 33  | 20,89 | 11     | 33,3  | 0,023 | 1,3 | 1,04  | 1,74 |
| Medication            | no(0)           | 130 | 81,25 | 40     | 30,8  |       |     |       |      |
|                       | yes(1)          | 30  | 18,75 | 4      | 13,3  | 0,004 | 0,4 | 0,25  | 0,77 |
| Employment            | no(0)           | 135 | 84,91 | 39     | 28,9  |       |     |       |      |
|                       | yes(1)          | 24  | 15,09 | 5      | 20,8  | 0,055 | 0,7 | 0,52  | 1,01 |
| Electricity           | no(0)           | 16  | 10,06 | 3      | 18,8  |       |     |       |      |
|                       | yes(1)          | 143 | 89,94 | 41     | 28,7  | 0,151 | 1,5 | 0,86  | 2,73 |
| Running water         | no(0)           | 60  | 37,74 | 16     | 26,7  |       |     |       |      |
|                       | yes(1)          | 99  | 62,26 | 28     | 28,3  | 0,640 | 1,1 | 0,83  | 1,36 |
| Refrigerator          | no(0)           | 50  | 31,45 | 12     | 24    |       |     |       |      |
|                       | yes(1)          | 109 | 68,55 | 32     | 29,4  | 0,038 | 1,2 | 1,01  | 1,48 |
| Education             | Primary         | 72  | 45,57 | 22     | 30,6  | 0,119 | 1,3 | 0,94  | 1,66 |
|                       | secondary/tert  | 86  | 54,43 | 21     | 24,4  |       |     |       |      |
| RVD infected          | no(0)           | 101 | 63,52 | 30     | 29,7  |       |     |       |      |
|                       | yes(1)          | 58  | 36,48 | 14     | 24,1  | 0,075 | 0,8 | 0,65  | 1,02 |
| ARTs                  | FTC             | 45  | 93,75 | 10     | 22,2  |       |     |       |      |
|                       | second line     | 2   | 4,17  | 0      | 0     |       |     |       |      |

|  |       |   |      |   |   |  |  |  |
|--|-------|---|------|---|---|--|--|--|
|  | Other | 1 | 2,08 | 0 | 0 |  |  |  |
|--|-------|---|------|---|---|--|--|--|

PROM: premature rupture of membranes, RVD: retroviral disease, ARTs: anti-retroviral treatment

### Offspring and maternal multiple regression analysis:

Significant independent statistical associations for many offspring-related variables could be seen: Gestational age and birth weight with  $p < 0.001$ : RR=1; 95% CI: 0.95–0.95 and  $p = 0.004$ : RR=1.2; 95% CI: 1.05–1.32 respectively. Exposure to an HIV-infected mother became significant:  $p < 0.001$ : RR=2; 95% CI: 1.76–2.21. Resuscitation at birth ( $p < 0.001$ ; RR=2.9; 95% CI: 2.25–3.69), HMD ( $p < 0.001$ ; RR=0.93; 95% CI: 0.93–0.93) and the following necessity to give surfactant ( $p < 0.001$ ; RR=1.65; 95% CI: 1.47–1.84) correlated with an increased mortality risk. ICH was also found to be a significant risk factor for in-hospital mortality with  $p < 0.001$ ; RR=2.01; 95% CI: 1.80–2.26. Unsurprisingly the need for resuscitation during hospital stay correlated with an increased risk of dying ( $p = 0.011$ ; RR=13.7; 95% CI: 7.17–26.19).

The multiple regression analysis of maternal risks showed, that being born to a mother with hypertension was protective and decreased the risk of dying in hospital ( $p < 0.001$ ; RR=0.6; 95% CI: 0.51–0.77). The risk of mortality was 37% lower for the babies born to mothers with hypertension compared to mothers without. All other maternal factors were non-significant in the multivariate analysis.

### Discussion:

The incidence of VLBW in our hospital was 41 in 1000 births for the year from December 2017 to November 2018 (95%CI: 35.0–47.7). The prevalence of VLBW in our hospital was 4,7%. This is a high prevalence of VLBW babies born compared to developed countries, such as the USA with a prevalence of 1,4% (30), Europe between 0,8–1,2 (31) and China with 1,9% (32) but also compared to the prevalence found in Soweto, South Africa of 3% and in Brazil of 0,9%–3% (1,7,33). However, it is within the prevalence of 3–7% reported worldwide (3,13).

Survival of infants below 1000 g birth weight was 46.5% compared to 81.4% for those weighing between 1000 g and below 1500 g at birth. The overall neonatal survival rates of VLBW compare well with some other developing and developed countries in the last 15 years, with 63.1% in India (2), 70.9% in Iran (3), and 71.8% in South Korea (11) or 68% in the Eastern Mediterranean Region (34). It is, though, lower than in other parts of South

1  
2  
3 Africa where the survival rate was reported as 73.4%, 75% and 75.7% respectively  
4 (18,35,36) and much lower than in most developed countries, where the survival rate was  
5 found to be between 86.6% and 90.3% (12,23,31,32,37–42). This shows, that the Eastern  
6 Cape Province lags behind other South African urban settings in the effort to improve the  
7 survival of VLBW neonates.  
8  
9  
10

11  
12 Consistent with other studies examining the causes of mortality in VLBW babies, birth weight  
13 (specifically extremely low birth weight) and low gestational age were found to be major  
14 predictors for neonatal mortality in our study population (17,20,23,31,35,43,44).  
15

16 Complications of prematurity, such as the development of hyaline membrane disease and  
17 the associated need for surfactant application was associated with a significant increased  
18 risk of mortality.  
19  
20  
21

22  
23 Interestingly our study could not confirm the wide range of maternal factors increasing the  
24 risk of death during admission found in other studies such as no antenatal care, premature  
25 rupture of membranes, maternal primi-parity, mode or complication of delivery  
26 (17,21,22,27,44,45). The only socio-economic factor showing in the univariate analysis as a  
27 significant higher risk of baby dying during admission was when the mother was of teenage  
28 age, and whether a refrigerator was present in the household the mother lived in. These  
29 factors lost significance, however, when a multivariate analysis was used. Here exposure to  
30 an HIV-infected mother became significant.  
31  
32  
33

34  
35  
36 Infants born to mothers with hypertension had a better chance of survival than those born to  
37 a mother who did not had hypertension. A multicentre prospective cohort study from Brazil  
38 by de Alemida *et al.* found the same correlation (1).  
39  
40

41  
42 Although a substantial percentage (36%) of the babies were born to HIV infected mothers,  
43 all but three (who all died before HIV-PCR could be taken) were born with a negative HIV-  
44 PCR infection. However, 17.2% (n=10) of the HIV infected mothers still had not received any  
45 ART before giving birth. However, all mothers received prophylaxis in labour and their  
46 babies were treated with nevirapine and zidovudine as high risk infants.  
47  
48  
49  
50  
51

## 52 **Conclusion:**

53  
54 Our study shows that the survival rate in VLBW babies is comparable to other developing  
55 countries worldwide, but lower than in the urban hospitals of South Africa. Similar to the  
56 findings of many other studies, gestational age and birth weight were the main baby-related  
57  
58  
59  
60

1  
2  
3 predictors for survival, and HIV infection of the mother was the only maternal risk factor,  
4 while pregnancy hypertension was found to be protective.

5  
6 These findings indicate that the survival of VLBW and especially for ELBW babies are lower  
7 in a setting with low resources. The Eastern Cape Province is known to be one of the most  
8 disadvantaged areas in South Africa and this still has an impact on the survival of the most  
9 vulnerable members of our society.  
10  
11  
12  
13  
14  
15  
16  
17  
18  
19  
20  
21  
22  
23  
24

#### 25 **Literature:**

- 26  
27 1. De Almeida MFB, Guinsburg R, Martinez FE et al. Fatores perinatais associados ao  
28 óbito precoce em prematuros nascidos nos centros da Rede Brasileira de Pesquisas  
29 Neonatais. *J Pediatr (Rio J)*. 2008;84(4):300–7.
- 30  
31 2. Basu S, Rathore P, Bhatia BD. Predictors of mortality in very low birth weight  
32 neonates in India. *Singapore Med J*. 2008;49(7):556–60.
- 33  
34 3. Afjeh SA, Sabzehei MK, Fallahi M et al. Outcome of very low birth weight infants over  
35 3 years report from an iranian center. *Iran J Pediatr*. 2013; 23(5):579–587
- 36  
37 4. Rhoda NR, Gebhardt GS, Kauchali S BP. Reducing neonatal deaths in South Africa.  
38 *S Afr Med J*. 2018;3(1):S9–19.
- 39  
40 5. World Health Organization. Newborns: reducing mortality. World Heal Organ  
41 [Internet]. 2019;(September 2019):2018–21. Available from:  
42 <http://www.who.int/mediacentre/factsheets/fs178/en/>
- 43  
44 6. Haas DM. Preterm birth. *BMJ Clin Evid*. 2011;2011(1):1–5.
- 45  
46 7. Velaphi SC, Mokhachane M, Mphahlele RM, et al. Survival of very-low-birth-weight  
47 infants according to birth weight and gestational age in a public hospital. *South*  
48 *African Med J*. 2005; 95: 504-509.
- 49  
50 8. Mackay CA, Ballot DE, Cooper PA. Growth of a cohort of very low birth weight infants  
51 in Johannesburg, South Africa. *BMC Pediatr*. 2011;11:2–7.  
52  
53  
54  
55  
56  
57  
58  
59  
60



- 1
  - 2
  - 3
  - 4
  - 5
  - 6
  - 7
  - 8
  - 9
  - 10
  - 11
  - 12
  - 13
  - 14
  - 15
  - 16
  - 17
  - 18
  - 19
  - 20
  - 21
  - 22
  - 23
  - 24
  - 25
  - 26
  - 27
  - 28
  - 29
  - 30
  - 31
  - 32
  - 33
  - 34
  - 35
  - 36
  - 37
  - 38
  - 39
  - 40
  - 41
  - 42
  - 43
  - 44
  - 45
  - 46
  - 47
  - 48
  - 49
  - 50
  - 51
  - 52
  - 53
  - 54
  - 55
  - 56
  - 57
  - 58
  - 59
  - 60
9. Martin JA, Hamilton BE, D P, Sutton PD, Ventura SJ, Menacker F, et al. National Vital Statistics Reports Births : Final Data for 2013. *Statistics* (Ber). 2015;64(1):1–104.
10. Liu L, Oza S, Hogan D, et al. Global, regional, and national causes of under-5 mortality in 2000–15: an updated systematic analysis with implications for the Sustainable Development Goals. *Lancet*. 2016;388(10063):3027–35.
11. Hahn WH, Chang JY, Chang YS, et al. Recent trends in neonatal mortality in very low birth weight korean infants: In comparison with Japan and the USA. *J Korean Med Sci*. 2011;26(4):467–73.
12. Chung SH, Bae CW. Improvement in the survival rates of very low birth weight infants after the establishment of the Korean neonatal network: Comparison between the 2000s and 2010s. *J Korean Med Sci*. 2017; 32(8):1228-1234
13. Fanaroff AA, Stoll BJ, Wright LL, et al. Trends in neonatal morbidity and mortality for very low birthweight infants. *Am J Obstet Gynecol*. 2007; 196(2):147.e1-8
14. Bansal A. Comparison of outcome of very-low-birth-weight babies with developed countries: A prospective longitudinal observational study. *J Clin Neonatol*. 2018;7(4):254.
15. Nannan N, Dorrington R, Laubscher R, et al. Under-5 mortality statistics in South Africa: Shedding some light on the trend and causes 1997-2007. *South African Medical Research Council*. 2012.
16. Bradshaw D, Dorrington R. *Rapid Mortality Surveillance Report 2011*. 2012.
17. Kalimba EM, Ballot DE. Survival of extremely low-birth-weight infants. *SAJCH South African J Child Heal*. 2013;7(1):13–6.
18. Tshehla RM, Coetzee M, Becker PJ. Mortality and morbidity of very low-birthweight and extremely low-birthweight infants in a tertiary hospital in Tshwane. 2019;13(2). *SAJCH* 2019; 13(2): 89-97.
19. Terzic S, Heljic S. Assessing mortality risk in very low birth weight infants. *Med Arh*. 2012;66(2):76–9.
20. Kabilan S, Kumar MS. Morbidity and mortality pattern of very low birth weight infants admitted in SNCU in a South Asian tertiary care centre. *Int J Contemp Pediatr*. 2018;5(3):720–5.
21. Cupen K, Barran A, Singh V, et al. Risk Factors Associated with Preterm Neonatal Mortality: A Case Study Using Data from Mt. Hope Women’s Hospital in Trinidad and

- 1  
2  
3 Tobago. *Children*. 2017;4(12):108.  
4  
5  
6 22. Vaahtera M, Kulmala T, Ashorn P, et al. Antenatal and perinatal predictors of infant  
7 mortality in rural Malawi. *Arch Dis Child Fetal Neonatal Ed*. 2000;82(3):200–4.  
8  
9  
10 23. Chen SD, Lin YC, Lu CL, et al. Changes in outcome and complication rates of very-  
11 low-birth-weight infants in one tertiary center in southern Taiwan between 2003 and  
12 2010. *Pediatr Neonatol* [Internet]. 2014;55(4):291–6. Available from:  
13 <http://dx.doi.org/10.1016/j.pedneo.2013.10.010>  
14  
15  
16 24. Townsend CL, Schulte J, Thorne C, et al. Antiretroviral therapy and preterm delivery-a  
17 pooled analysis of data from the United States and Europe. *BJOG An Int J Obstet*  
18 *Gynaecol*. 2010;117(11):1399–410.  
19  
20  
21 25. Van Der Merwe K, Hoffman R, Black V, et al. Birth outcomes in South African women  
22 receiving highly active antiretroviral therapy: A retrospective observational study. *J Int*  
23 *AIDS Soc* [Internet]. 2011;14(1):42. Available from:  
24 <http://www.jiasociety.org/content/14/1/42>  
25  
26  
27 26. Powis KM, Kitch D, Ogwu A, et al. Increased risk of preterm delivery among HIV-  
28 infected women randomized to protease versus nucleoside reverse transcriptase  
29 inhibitor-based HAART during pregnancy. *J Infect Dis*. 2011;204(4):506–14.  
30  
31  
32 27. Uthman OA, Nachega JB, Anderson J, et al. Timing of initiation of antiretroviral  
33 therapy and adverse pregnancy outcomes: a systematic review and meta-analysis.  
34 *Lancet HIV*. 2017;4(1):e21–30.  
35  
36  
37 28. González R, Rupérez M, Sevene E, et al. Effects of HIV infection on maternal and  
38 neonatal health in southern Mozambique: A prospective cohort study after a decade  
39 of antiretroviral drugs roll out. *PLoS One*. 2017;12(6):1–11.  
40  
41  
42 29. Department of Health Republic of South Africa. National Antenatal Sentinel & Syphilis  
43 Survey Report. *Tech Reports*. 2017;  
44  
45  
46 30. Martin JA, Hamilton BE, Osterman MJK, et al. Births: Final data for 2018. *Natl Vital*  
47 *Stat Reports*. 2019;  
48  
49  
50 31. Numerato D, Fattore G, Tediosi F, et al. Mortality and length of stay of very low birth  
51 weight and very preterm infants: A EuroHOPE study. *PLoS One*. 2015;10(6):1–12.  
52  
53  
54 32. Zhu JJ, Bao YY, Zhang GL, et al. No relationship between mode of delivery and  
55 neonatal mortality and neurodevelopment in very low birth weight infants aged two  
56 years. *World J Pediatr*. 2014;10(3):227–31.  
57  
58  
59  
60

- 1  
2  
3 33. Victora JD, Silveira MF, Tonial CT, et al. Prevalence, mortality and risk factors  
4 associated with very low birth weight preterm infants: an analysis of 33 years. *J*  
5 *Pediatr (Rio J)*. 2018; 96 (3): 327-332  
6  
7  
8  
9 34. Nayeri F, Emami Z, Mohammadzadeh Y, et al. Mortality and Morbidity Patterns of  
10 Very Low Birth Weight Newborns in Eastern Mediterranean Region: A Meta-Analysis  
11 Study. *J Pediatr Rev*. 2018;7(2):67–76.  
12  
13  
14 35. Ballot DE, Chirwa T, Ramdin T, et al. Comparison of morbidity and mortality of very  
15 low birth weight infants in a Central Hospital in Johannesburg between 2006/2007 and  
16 2013. *BMC Pediatr*. 2015;15(1):1–11.  
17  
18  
19 36. Gibbs L, Tooke L, Harrison MC. Short-term outcomes of inborn v . outborn very-low-  
20 birth-weight neonates ( < 1 500 g ) in the neonatal nursery at Groote Schuur Hospital ,  
21 Cape Town , South Africa. *S Afr Med J* 2017;107(10):900-903.  
22  
23  
24 37. Darlow BA, Cust AE, Donoghue DA. Improved outcomes for very low birthweight  
25 infants: Evidence from New Zealand national population based data. *Arch Dis Child*  
26 *Fetal Neonatal Ed*. 2003;88(1):23–8.  
27  
28  
29 38. Moro M, Figueras-Aloy J, Fernández C, et al. Mortality for newborns of birthweight  
30 less than 1500 g in Spanish Neonatal Units (2002-2005). *Am J Perinatol*. 2007;  
31 26(5): 335-343  
32  
33  
34 39. Tomé T, Guimarães H, Bettencourt A, et al. Neonatal morbi-mortality in very low birth  
35 weight in Europe: The Portuguese experience. *Journal of Maternal-Fetal and*  
36 *Neonatal Medicine*. 2009; 22(S3): 85–87.  
37  
38  
39 40. Rüegger C, Hegglin M, Adams M, et al. Population based trends in mortality,  
41 morbidity and treatment for very preterm- and very low birth weight infants over 12  
42 years. *BMC Pediatr* [Internet]. 2012;12(1):17. Available from:  
43 <http://www.biomedcentral.com/1471-2431/12/17>  
44  
45  
46 41. Horbar JD, Carpenter JH, Badger GJ, et al. Mortality and neonatal morbidity among  
47 infants 501 to 1500 grams from 2000 to 2009. *Pediatrics*. 2012;129(6):1019–26.  
48  
49  
50 42. Jeschke E, Biermann A, Günster C, et al. Mortality and major morbidity of very-low-  
51 birth-weight infants in Germany 2008-2012: A report based on administrative data.  
52 *Front Pediatr*. 2016;4(MAR):1–8.  
53  
54  
55 43. Schindler T, Koller-Smith L, Lui K, et al. Causes of death in very preterm infants cared  
56 for in neonatal intensive care units: A population-based retrospective cohort study.  
57  
58  
59  
60

1  
2  
3 *BMC Pediatr.* 2017;17(1):1–9.  
4

5 44. Zile I, Ebela I, Rozenfelde IR. Risk factors associated with neonatal deaths among  
6 very low birth weight infants in Latvia. *Curr Pediatr Res.* 2017;21(1):64–8.  
7

8  
9 45. Yego F, D'Este C, Byles J, et al. A case-control study of risk factors for fetal and early  
10 neonatal deaths in a tertiary hospital in Kenya. *BMC Pregnancy Childbirth.*  
11 2014;14(1):1–9.  
12  
13  
14  
15  
16  
17  
18  
19  
20  
21  
22  
23  
24  
25  
26  
27  
28  
29  
30  
31  
32  
33  
34  
35  
36  
37  
38  
39  
40  
41  
42  
43  
44  
45  
46  
47  
48  
49  
50  
51  
52  
53  
54  
55  
56  
57  
58  
59  
60

Confidential: For Review Only

1  
2  
3  
4  
5  
6  
7  
8  
9  
10  
11  
12  
13  
14  
15  
16  
17  
18  
19  
20  
21  
22  
23  
24  
25  
26  
27  
28  
29  
30  
31  
32  
33  
34  
35  
36  
37  
38  
39  
40  
41  
42  
43  
44  
45  
46  
47  
48  
49  
50  
51  
52  
53  
54  
55  
56  
57  
58  
59  
60

Confidential: For Review Only

1  
2  
3  
4  
5  
6  
7  
8  
9  
10  
11  
12  
13  
14  
15  
16  
17  
18  
19  
20  
21  
22  
23  
24  
25  
26  
27  
28  
29  
30  
31  
32  
33  
34  
35  
36  
37  
38  
39  
40  
41  
42  
43  
44  
45  
46  
47  
48  
49  
50  
51  
52  
53  
54  
55  
56  
57  
58  
59  
60

Confidential: For Review Only

1  
2  
3  
4  
5  
6  
7  
8  
9  
10  
11  
12  
13  
14  
15  
16  
17  
18  
19  
20  
21  
22  
23  
24  
25  
26  
27  
28  
29  
30  
31  
32  
33  
34  
35  
36  
37  
38  
39  
40  
41  
42  
43  
44  
45  
46  
47  
48  
49  
50  
51  
52  
53  
54  
55  
56  
57  
58  
59  
60

Confidential: For Review Only

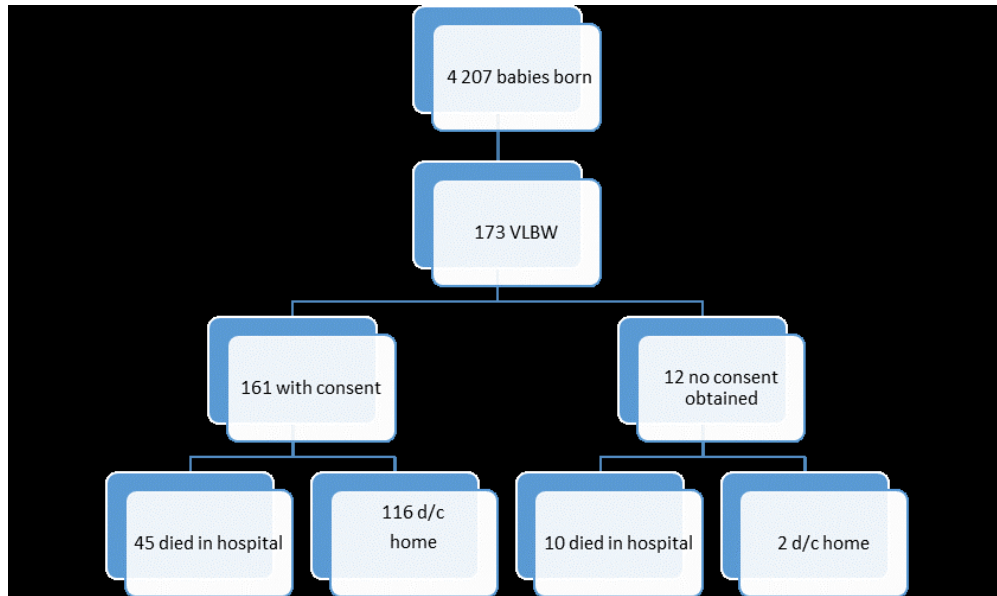



**FNo:****Data of child at birth:**

- 1  
2  
3  
4  
5  
6  
7 Date of birth:
- 8  
9 Gender  female  male
- 10  
11 Gestational age:
- 12  
13 Mode of delivery:  NVD  Sectio  Vacuum or forceps
- 14  
15 HIV exposed:  exposed  unexposed
- 16  
17 PMTCT  yes  no
- 18  
19 Birth weight: gr
- 20  
21 Length: cm
- 22  
23 Head circumferences: cm
- 24  
25 Resuscitation at birth:  yes  no
- 26  
27 APGAR 1min 5 min 10 min
- 28  
29 Diagnosis at birth:
- 30  
31 Oxygen support  yes  no
- 32  
33 Surfactant:  yes  no
- 34  
35 Ventilatory support:  none  CPAP  Invasive ventilation
- 36  
37 If yes, how long days
- 38  
39 Maximum of oxygen needed:  < 60%  > 60%
- 40  
41 Feeding option  Breast  formula  mixed
- 42  
43 Trend of weight gain:  normal  abnormal
- 44  
45 Sepsis :  yes  no
- 46  
47 PVL or IVH:  yes  no
- 48  
49 PDA:  yes  no
- 50  
51 Steroid use (postnatal):  yes  no
- 52  
53 Resuscitation during hospital stay:  yes  no
- 54  
55  
56  
57  
58  
59  
60

1  
2  
3 Mother's Data:  
4  
5  
67 Age of mother:  
89 Number of pregnancy: 10 Children alive: 11 Marital status:  married  stable relationship  single  
1213 During pregnancy:  
1415 Hypertension:  yes  no  
1617 PT rupture of membranes:  yes  no  
1819 Preeclampsia/ Eclampsia  yes  no  
2021 Any other problems (e.g. seizures, drug abuse, diabetes)  
2223 SES of mother:  employed  unemployed  
2425 Electricity at home:  yes  no  
2627 Running water at home:  yes  no  
2829 Fridge:  yes  no  
3031 Educational level:  primary school  matric  tertiary education  
3233 Mother's HIV status:  positive  negative  
3435 If positive:  
3637 ARVs since when: weeks before birth  
3839 ARVS:  FDC  second line  other  
4041 Disclosure to anyone:  
4243 Has partner been tested:  
44  
45  
46  
47  
48  
49  
50  
51  
52  
53  
54  
55  
56  
57  
58  
59  
60

# BMJ Paediatrics Open

## Prospective cohort study of mortality in very low birth weight infants in a single centre in the Eastern Cape Province, South Africa

|                               |                                                                                                                                                                                                                                                                                                                                                                                                                                                           |
|-------------------------------|-----------------------------------------------------------------------------------------------------------------------------------------------------------------------------------------------------------------------------------------------------------------------------------------------------------------------------------------------------------------------------------------------------------------------------------------------------------|
| Journal:                      | <i>BMJ Paediatrics Open</i>                                                                                                                                                                                                                                                                                                                                                                                                                               |
| Manuscript ID                 | bmjpo-2020-000918.R1                                                                                                                                                                                                                                                                                                                                                                                                                                      |
| Article Type:                 | Original research                                                                                                                                                                                                                                                                                                                                                                                                                                         |
| Date Submitted by the Author: | 23-Dec-2020                                                                                                                                                                                                                                                                                                                                                                                                                                               |
| Complete List of Authors:     | Michaelis, Isabel; Walter Sisulu University, Paediatrics<br>Manyisane, Ncomeka; Walter Sisulu University, Paediatrics<br>Krägeloh-Mann, Ingeborg; Eberhard Karls University Tübingen Faculty of Medicine, Children's Hospital, Neuropaediatrics, Developmental Neurology, Social Paediatrics<br>Mazinu, Mikateko; South African Medical Research Council, Biostatistics unit<br>Jordaan, Esme; South African Medical Research Council, Biostatistics unit |
| Keywords:                     | Neonatology, Mortality                                                                                                                                                                                                                                                                                                                                                                                                                                    |
|                               |                                                                                                                                                                                                                                                                                                                                                                                                                                                           |

SCHOLARONE™  
Manuscripts



I, the Submitting Author has the right to grant and does grant on behalf of all authors of the Work (as defined in the below author licence), an exclusive licence and/or a non-exclusive licence for contributions from authors who are: i) UK Crown employees; ii) where BMJ has agreed a CC-BY licence shall apply, and/or iii) in accordance with the terms applicable for US Federal Government officers or employees acting as part of their official duties; on a worldwide, perpetual, irrevocable, royalty-free basis to BMJ Publishing Group Ltd ("BMJ") its licensees and where the relevant Journal is co-owned by BMJ to the co-owners of the Journal, to publish the Work in this journal and any other BMJ products and to exploit all rights, as set out in our [licence](#).

The Submitting Author accepts and understands that any supply made under these terms is made by BMJ to the Submitting Author unless you are acting as an employee on behalf of your employer or a postgraduate student of an affiliated institution which is paying any applicable article publishing charge ("APC") for Open Access articles. Where the Submitting Author wishes to make the Work available on an Open Access basis (and intends to pay the relevant APC), the terms of reuse of such Open Access shall be governed by a Creative Commons licence – details of these licences and which [Creative Commons](#) licence will apply to this Work are set out in our licence referred to above.

Other than as permitted in any relevant BMJ Author's Self Archiving Policies, I confirm this Work has not been accepted for publication elsewhere, is not being considered for publication elsewhere and does not duplicate material already published. I confirm all authors consent to publication of this Work and authorise the granting of this licence.

## Title Page

Prospective cohort study of mortality in very low birth weight infants in a single centre in the Eastern Cape Province, South Africa

Isabel Michaelis, MD, PhD, Walter Sisulu University, East London

Ingeborg Krägeloh- Mann, Professor of Paediatrics, Eberhard Karls University of Tübingen, Tübingen

Ncomeka Manyisane, McBCh, FcPaed, Walter Sisulu University, East London

Mikateko Mazinu, MSc Biomathematics, South African Medical Research Council, Tygerberg

Esme Jordaan, MSc Statistics, South African Medical Research Council, Tygerberg and Statistics and Population Studies Department, University of the Western Cape

Corresponding author: Isabel Michaelis, Private Bag 9047, Amalinda Main Road, 5200 East London, Tel: +27 (43) 709 2077, Fax: +27 (43) 709 4065. [isabel.michaelis@ehealth.gov.za](mailto:isabel.michaelis@ehealth.gov.za)

[Key words: neonatology, VLBW, infant mortality, sub Saharan Africa, global health](#)

Word count: 2425 (without tables and abstract)

Dr Isabel Michaelis

1  
2  
3 Prospective cohort study of mortality in very low birth weight infants in a single centre  
4 in the Eastern Cape Province, South Africa  
5  
6  
7

8 Isabel Michaelis, MD, PhD, Walter Sisulu University, East London

9 Ingeborg Krägeloh-Mann, Professor of Paediatrics, Eberhard Karls University of Tübingen, Tübingen

10 Ncomeka Manyisane, McBCh, FcPaed, Walter Sisulu University, East London

11 Mikateko Mazinu, MSc Biomathematics, South African Medical Research Council, Tygerberg

12 Esme Jordaan, MSc Statistics, African Medical Research Council, Tygerberg  
13  
14  
15  
16  
17

18 Contact: isabel.michaelis@echealth.gov.za  
19  
20

21 I hereby confirm that neither the submitted paper nor any parts of it have been published or  
22 submitted anywhere else.  
23

24 There is no conflict of interest. This work was supported by the South African Medical  
25 Research Council (SAMRC) Fund, grant number (086/2017). The sponsorship of the  
26 SAMRC Pilot Grant serves to encourage clinicians in rural South Africa to engage in  
27 research.  
28  
29  
30

31 Dr Isabel Michaelis' contribution consisted of funding acquisition, study design, investigation,  
32 data curation, supervision and drafting the initial manuscript.  
33

34 Dr Ncomeka Manyisane contributed to study design, investigation, data curation and  
35 reviewing the manuscript.  
36

37 Prof Ingeborg Krägeloh-Mann contributed to supervision, writing and reviewing the final  
38 manuscript.  
39

40 Mrs Mikateko Mazinu contributed to data curation and data analysis.

41 Mrs Esme Jordaan contributes to data curation and data analysis and writing and reviewing  
42 the final manuscript.  
43  
44  
45  
46

47 **What is known about this topic?**

48 The perinatal mortality rate in sub-Saharan Africa is about 30 per 1000 live births. Preterm and  
49 VLBW infants account for a large number of neonatal deaths. Although South Africa is  
50 considered an upper-middle-income country by the World Bank, survival of VLBW varies greatly  
51 dependent on resources. Survival of VLBW infants in studies from South Africa are about 75%.  
52  
53

54 **What does this study add?**

55 Survival of VLBW infants was 68% in our cohort. This shows that the chance of survival for  
56 those babies in our setting is lower than in other South African urban settings. Causes for  
57 this difference should be further explored.  
58  
59  
60

**Background:**

Neonatal mortality is a major contributor worldwide to the number of deaths in children under 5 years of age. The primary objective of this study was to assess the overall mortality rate of babies with a birth weight of less than 1500g in a neonatal unit at a tertiary hospital in the Eastern Cape Province, South Africa. Furthermore, different maternal and infant related factors for higher mortality were analysed.

**Methods:**

This is a prospective cohort study which included infants admitted to the neonatal wards of the hospital within their first 24 hours of life and with a birth weight equal to or below 1500g.

**Results:**

173 very low birth weight (VLBW) infants were admitted to the neonatal department between November 2017 and December 2018. The overall mortality was 32%. More than half (53.5%) of the infants with a birth weight below 1000g died during admission.

Main predictors for mortality were lower gestational age and lower birth weight. Need for ventilator support and sepsis increased mortality risk significantly, as did maternal factors such as HIV infection and age below 20 years. VLBW babies born to a mother with gestational hypertension had a two-fold increased chance of survival, most likely due to associated intrauterine growth restriction with higher gestational age at birth relative to weight.

**Conclusion:**

This prospective study looked at survival of very low birth weight babies in an underprivileged part of the Eastern Cape of South Africa. Compared to other public urban hospitals in the country the survival rate remains unacceptably low. Further research is required to find the associated causes and appropriate ways to address these.

## Introduction:

Despite improved survival rates of neonates worldwide, the survival of preterm and low birth weight babies is still a challenge, especially in middle- and low-income countries (1–4).

In 2018, the World Health Organisation (WHO) described a worldwide increase of babies born prematurely over the last two decades. The incidence has been estimated between 5 to 18% of all life births (5,6). The prevalence of babies born with a very low birth weight (VLBW) varies between different countries. For example, in one South African study the prevalence was 3%, while in the USA it lies between 1.23 and 1.43% (7–9). Furthermore, prematurity and low birth weight have been identified as the leading causes of mortality in children less than five years of age (5,10–12). It is also well known that neonatal mortality for VLBW infants varies considerably amongst high- and low-middle income countries: a mortality rate of 15% is found in the United States (13), 20% by the Vermont Oxford network (14), 29.1% in Iran (3), 28.2% in South Korea (11), 32% in the Eastern Mediterranean Region (15), and 24.6% in India (16). Some single centres worldwide show a lower mortality rate with 9.5%, 12.4%, 13.0% and 17.2% in single centres in Singapore, Taiwan, Hong-Kong, Saudi-Arabia, respectively (14,17–19).

In South Africa, neonatal mortality accounted for 32% of the under-5 mortality rate (4,20,21). A recent study illustrated survival rates of VLBW neonates between different hospitals in the Western Cape Province of South Africa as characterized by unrestricted or restricted resources (22). The team found a significant difference with a survival rate of 84.4% and 70.4% respectively (22). Kalimba and Ballot (23) studied the survival rate of extremely low birth weight (ELBW) babies (babies weighing less than 1000g at birth) born between 2006 and 2010 in Johannesburg and found that only 25.6% of babies born with a birth weight of less than 900g survived their hospital stay, with birth weight and gestational age being the strongest predictors for survival. A newer retrospective cross-sectional South African study found an overall survival rate in VLBW babies (500g–1499g) of 75.7% (24).

However, there are also other known contributory factors, which can be divided into infant-or maternal-related risk factors. Examples of neonate-related risk factors studied in the literature include low Apgar scores, hyaline membrane disease (HMD), intubation and mechanical ventilation, sepsis, and hemodynamic instability (25,26). Maternal or obstetric risk factors include eclampsia, alcohol consumption, smoking, low socioeconomic status, scarce antenatal care and human immunodeficiency virus (HIV) infection (18,23,27,28).

Several studies suggest an increased risk of premature labour in mothers taking antiretroviral treatment for HIV infection during pregnancy (29–32), while others did not find a



1  
2  
3 relationship (33). This is noteworthy, as 30.8% of pregnant women in South Africa tested  
4 positive for HIV in 2015, and are put on treatment as soon as the infection is diagnosed  
5 (34,35).  
6  
7

8 The primary aim of this study was to research neonatal mortality of VLBW infants admitted to  
9 the neonatal unit in a hospital in a mixed urban and rural setting in the Eastern Cape  
10 Province of South Africa. Secondly, the association between death and different maternal  
11 and neonatal factors were explored.  
12  
13  
14

### 15 16 17 18 **Setting:**

19  
20 Frere Hospital is a large (885 beds) public tertiary hospital in East London in the Eastern  
21 Cape Province in South Africa, with a seven-bed paediatric intensive care unit (PICU), which  
22 cares for neonates and paediatric medical and surgical patients. Because of this very limited  
23 PICU access, babies with a weight below 1000g are not provided with invasive ventilatory  
24 support due to poor survival. These babies will receive surfactant if needed and continuous  
25 positive airway pressure (CPAP) ventilation is available for six infants in the high care  
26 neonatal unit, which can cater for 12 infants altogether. This high care ward is constantly  
27 above capacity, often having to care for up to 20 infants, when there is only adequate space  
28 for the above-mentioned 12 neonates. Infants with a birth weight over 1000g will be taken to  
29 PICU and receive invasive ventilation if needed and if space is available for them. Stable  
30 neonates with a weight of more than 1000g are referred to the general nursery ward, where  
31 they receive kangaroo care (KMC) in the ward and, if necessary, intravenous fluids and/or  
32 antibiotics and oxygen. Once clinically stable, off oxygen support, tolerating full enteral feeds  
33 and weighing more than 1500g, infants will be transferred to the KMC ward until mothers are  
34 competent in caring for their baby and the weight has increased to at least 1700 g. Some  
35 stable babies might be transferred to their regional hospital once their weight has reached  
36 1500g.  
37  
38  
39  
40  
41  
42  
43  
44  
45  
46

47 Frere Hospital is the tertiary neonatal and obstetric referral centre for obstetric units and for  
48 surrounding district hospitals in the middle part of the Eastern Cape Province. Some  
49 referrals centres are more than 300 km away. These areas were deprived of adequate  
50 infrastructure during the Apartheid regime and are still one of the most under-resourced and  
51 insufficiently managed parts of South Africa.  
52  
53  
54

### 55 56 **Materials and Methods:**

57  
58 This was a prospective cohort study. All babies born at the hospital, or admitted within the  
59 first 24 hours of life into the neonatal unit, with a birth weight equal or below 1500g and  
60

1  
2  
3 without any life-threatening malformations were included. Neonates who were admitted to  
4 the neonatal ward or PICU beyond 24 hours of life were excluded as it was not possible to  
5 get sufficient information on those mother-infant pairs. Mothers were then approached for  
6 consent to include their data. The recruitment period lasted from December 2017 to  
7  
8 November 2018.  
9  
10

11 The study was approved by the institutional ethics committee (086/2017) and, after receiving  
12 written consent from the mothers, data concerning mother and child during the pre-, peri-  
13 and neonatal period were collected from the maternal and neonatal case records, as well as  
14 from a questionnaire filled in with the mother (see supplements). The babies were followed  
15 up until discharge or death. All babies received standard care during this period, as outlined  
16 above.  
17  
18  
19  
20

21 Gestational age was determined by either an early ultrasound or by applying the Ballard  
22 gestational age scoring system. The different variables were defined as follows: a persistent  
23 ductus arteriosus as identified by echocardiogram; hyaline membrane disease by the  
24 presence respiratory distress;  $\text{FiO}_2$  requirement above 40% followed by a confirmatory blood  
25 gas and typical X-ray signs; sepsis as clinical signs confirmed with a positive blood, urine or  
26 cerebrospinal fluid culture and/or raised C-reactive protein (CRP) taken at least 24 hours  
27 apart; normal weight gain was determined when weight loss after birth did not exceed more  
28 than 10% and birth weight was regained within 10-14 days of life; intracranial haemorrhage  
29 (ICH) was diagnosed with cranial ultrasound, which was only performed in clinically unstable  
30 infants with the clinical suspicion of ICH; resuscitation at birth included mask or invasive  
31 ventilation with or without cardiac compressions and medication.  
32  
33  
34  
35  
36  
37  
38  
39  
40  
41

#### 42 **Patient and Public Involvement:**

43  
44 Mothers of VLBW and preterm babies often spend weeks in the neonatal wards with their  
45 very small and often very sick infant. As such, this is already an extremely stressful time,  
46 heightened by the constant uncertainty concerning the baby's survival. By informing our  
47 knowledge of factors associated with mortality, this study will hopefully improve counselling  
48 of mothers during admission and thus alleviate some anxiety.  
49  
50  
51

52 The patients, being mother-newborn pairs, were not involved in the study design. Every  
53 new-born admitted in our wards during the study period was assessed for inclusion in our  
54 study, no recruitment from the patient's side was necessary. The results of this study are  
55 verbally communicated to the mothers and/or caretakers, during their high-risk baby follow-  
56 up appointments.  
57  
58  
59  
60

### Statistical analysis:

Demographic data is presented as frequencies (percentages) for categorical data, and as means (SD) for continuous data. To test for association between the outcome variable (mortality) and the predictor variables, a log binomial regression model was used. In order to investigate the relationship between hypertension and mortality in babies in more detail, a multiple regression model was used, adjusting for IUGR and gestational age. The standard for significance for all analyses was a p-value <0.05. Data were analysed using STATA version 15.

### Results:

During the study period 4 342 babies were born in the hospital, 4 210 of these were live births and 231 (5.3%) were born with a birth weight between 500g and 1500g. Of those 231 VLBW infants, only 173 were admitted in our neonatal high care ward or to PICU. Of those, 55 died during admission, resulting in an overall mortality rate of 31.8% (95% CI: 25.2–39.2) for VLBW infants admitted to our unit. One hundred and sixty-one of the 173 VLBW infants were successfully recruited (caregivers gave informed consent) during the study period. Forty-five (28.0%) of those babies died before discharge and 116 (72.0%) were discharged home or referred to a peripheral hospital if they had reached a weight above 1500 g. For an overview of recruitment and numbers of participants, see Figure 1. All 116 babies discharged from hospital received a follow-up date for the high-risk clinic.

### Demographics:

The maternal age ranged between 14 and 46 years. Fifty-eight (36.0%) mothers had HIV infection diagnosed before or during pregnancy, or at birth. Thirty-nine of them (67.2%) had been on antiretroviral (ARV) treatment at delivery for more than 4 weeks. Sixteen (27.6%) mothers had been on ARV treatment for less than 4 weeks or were not on treatment at all when giving birth, and their babies were thus considered at high risk for HIV transmission and treated accordingly. For other variables please see Table 1.

Of the 161 babies included in the study, 96 were female (59.7%). Almost all HIV exposed babies (n=58) tested negative for HIV infection at birth with a negative birth HIV-polymerase chain reaction (HIV-PCR) (n=55; 94.8%). Three babies, who died a few hours after birth, did not receive an HIV-PCR at birth and their status is therefore unknown. For other variables please see Table 2.

Table 1: Maternal demographic variables

| Variables             | Category                    | Overall*<br>n (%) | Mortality**<br>n (%) |
|-----------------------|-----------------------------|-------------------|----------------------|
| Age of mother (years) | ≤20                         | 30 (18.6)         | 10 (33.3)            |
|                       | >20                         | 131 (81.4)        | 35 (26.7)            |
| Marital status        | Married/stable relationship | 91 (57.6)         | 24 (26.4)            |
|                       | No partner                  | 67 (42.4)         | 18 (26.8)            |
| Substance abuse       | Yes                         | 13 (8.1)          | 4 (30.8)             |
|                       | No                          | 147 (91.9)        | 40 (27.2)            |
| Employment            | Yes                         | 24 (15.1)         | 5 (20.8)             |
|                       | No                          | 135 (84.9)        | 39 (28.9)            |
| Electricity at home   | Yes                         | 143 (89.9)        | 41 (28.7)            |
|                       | No                          | 16 (10.1)         | 3 (18.8)             |
| Running water at home | Yes                         | 99 (62.3)         | 28 (28.3)            |
|                       | No                          | 60 (37.7)         | 16 (26.7)            |
| Refrigerator at home  | Yes                         | 109 (68.6)        | 32 (29.4)            |
|                       | No                          | 50 (31.5)         | 12 (24.0)            |
| Education level       | Primary                     | 72 (45.6)         | 22 (30.6)            |
|                       | Secondary/tertiary          | 86 (54.4)         | 21 (24.4)            |
| HIV-infection         | Yes                         | 58 (36.5)         | 14 (24.1)            |
|                       | No                          | 101 (63.5)        | 30 (29.7)            |
| ARTs                  | FDC                         | 45 (93.8)         | 10 (22.2)            |
|                       | Second line                 | 2 (4.2)           | 0 (0.0)              |
|                       | Other                       | 1 (2.1)           | 0 (0.0)              |

\*The overall number and percentage per risk factor

\*\*The number and percentage of babies who died per risk factor category.

HIV: human immunodeficiency virus, ART: antiretroviral treatment, FDC: fixed dose combination.

Table 2: Infant demographics variables

| Variables           | Category | Overall*<br>n (%) | Mortality**<br>n (%) |
|---------------------|----------|-------------------|----------------------|
| Gender              | Female   | 96 (59.6)         | 27 (28.1)            |
|                     | Male     | 65 (40.4)         | 18 (27.7)            |
| GA (weeks)          | 25-32    | 78 (49.1)         | 36 (46.2)            |
|                     | 33-37    | 81 (50.9)         | 9 (11.1)             |
| HIV exposed         | Yes      | 58 (36.0)         | 14 (24.1)            |
|                     | No       | 103 (64.0)        | 31 (30.1)            |
| PMTCT               | Yes      | 44 (27.3)         | 11 (25.0)            |
|                     | No       | 117 (72.7)        | 34 (29.1)            |
| Birth weight (g)    | ≤1000g   | 43 (26.7)         | 23 (53.5)            |
|                     | >1000g   | 118 (73.3)        | 22 (18.6)            |
| Born before arrival | Yes      | 11 (6.8)          | 2 (18.2)             |
|                     | No       | 150 (93.2)        | 43 (28.7)            |

|                        |                   |            |           |
|------------------------|-------------------|------------|-----------|
| Mother not been to ANC | Yes (no ANC)      | 25 (15.5)  | 8 (32.0)  |
|                        | No (ANC attended) | 136 (84.5) | 37 (27.2) |
| IUGR                   | Yes               | 111 (69.8) | 23 (20.7) |
|                        | No                | 48 (30.2)  | 21 (43.8) |

\*The overall number and percentage per risk factor

\*\*The number and percentage of babies who died per risk factor category.

GA: gestational age, HIV: human immunodeficiency virus, PMTCT: prevention of mother to child transmission, IUGR: intrauterine growth restriction.

### Factors associated with in hospital mortality:

Maternal associated factors for the univariate model:

Univariate regression analysis was used to examine the association between mortality and associated individual factors. Associated factors of infants dying while still in hospital were higher in babies of teenage mothers, mothers with illnesses and mothers on medication. Maternal hypertension and preeclampsia were associated with decreased mortality in the babies. Education level of the mother and other socio-economic status factors were not significantly related to a higher mortality risk during admission in our study, with employment status only showing a trend towards significance (Table 3).

Table 3: Significant univariate associations between VLBW infant mortality and maternal-related factors.

| Variables             | Category   | Risk Ratio (95% CI) | P value |
|-----------------------|------------|---------------------|---------|
| Age of mother (years) | ≤20 vs >20 | 1.25 (1.07- 1.45)   | 0.004   |
| Hypertension          | Yes vs no  | 0.62 (0.49 - 0.77)  | <0.0001 |
| Pre-eclampsia         | Yes vs no  | 0.69 (0.57 - 0.82)  | <0.0001 |
| Other illnesses       | Yes vs no  | 1.34 (1.04 - 1.74)  | 0.023   |
| Medication            | Yes vs no  | 0.43 (0.25 - 0.77)  | 0.004   |
| Employment            | Yes vs no  | 0.72 (0.52 - 1.01)  | 0.055   |
| Fridge                | Yes vs no  | 1.22 (1.01 - 1.48)  | 0.038   |

Other illnesses included malignancies, epilepsy, mental health disorders. Medication included all other medication besides antiretroviral treatment. CI: confidence interval. Most maternal factors that were not significantly associated with mortality in the regression analysis are not shown in this table.

Neonatal-associated factors:

There were many significant neonatal-associated factors related to infant mortality, such as low gestational age ( $p < 0.0001$ ), low birth weight ( $p < 0.00001$ ), IUGR ( $p < 0.0001$ ), and the need

for resuscitation at birth ( $p < 0.0001$ ) or during hospital stay ( $p = 0.011$ ). Male gender was not associated with higher mortality risk ( $p = 0.935$ ; RR=1.0; 95% CI: 0.7–1.5) (Table 4).

Table 4: Significant univariate associations between infant mortality and infant-related factors of VLBW infants

| Variables                 | Category          | Risk Ratio (95% CI) | P value |
|---------------------------|-------------------|---------------------|---------|
| Gender                    | Female vs Male    | 1.02 (0.70, 1.48)   | 0.935   |
| GA (weeks)                | 25-32 vs 33-37    | 4.15 (2.93, 5.88)   | <0.0001 |
| HIV exposed               | No vs yes         | 1.25 (1.00, 1.56)   | 0.053   |
| Birth weight (g)          | ≤1000 vs >1000    | 2.87 (2.08, 3.96)   | <0.0001 |
| IUGR                      | Yes vs no         | 0.47 (0.35, 0.65)   | <0.0001 |
| Resuscitation at birth    | Yes vs no         | 4.45 (3.43, 5.78)   | <0.0001 |
| Apgar 1 min               | 0-6 vs 7-10       | 2.46 (1.99, 3.05)   | <0.0001 |
| Apgar 5 min.              | 0-6 vs 7-10       | 2.42 (2.12, 2.77)   | <0.0001 |
| HMD                       | Yes vs no         | 2.03 (1.72, 2.38)   | <0.0001 |
| Other                     | Yes vs no         | 1.59 (1.20, 2.09)   | 0.001   |
| Oxygen support            | Yes vs no         | 9.68 (7.39, 12.68)  | <0.0001 |
| Days on oxygen            | 0-1 day vs >1 day | 1.44 (0.94, 2.21)   | 0.091   |
| Surfactant given          | Yes vs no         | 3.59 (2.77, 4.65)   | <0.0001 |
| Weight gain               | Yes vs no         | 3.39 (2.21, 5.19)   | <0.0001 |
| Sepsis                    | Yes vs no         | 6.41 (3.78, 10.88)  | <0.0001 |
| ICH                       | Yes vs no         | 5.19 (3.03, 8.90)   | <0.0001 |
| PDA                       | No vs yes         | 2.83 (1.47, 5.47)   | 0.002   |
| Resuscitation needed stay | Yes vs no         | 12.31 (5.85, 25.88) | 0.011   |

GA: gestational age, HIV: human immunodeficiency virus, IUGR: intrauterine growth restriction, HMD: hyaline membrane disease, ICH: intracranial haemorrhage, PDA: persistent ductus arteriosus, ANC: antenatal clinic, Other: other problems like neonatal jaundice, hypoglycaemia, necrotizing enterocolitis, hypothermia. CI: confidence interval. Infant-related factors that were not significantly associated with mortality in the univariate regression analysis are not shown in this table, besides gender.

### Multiple regression analysis

As could be seen in the univariate analysis, maternal hypertension was associated with decreased mortality in the babies. However, when adjusting for IUGR and gestational age in the multiple regression analysis, no significant association was found for maternal hypertension ( $p = 0.279$ ; RR=0.88; 95% CI: 0.70-1.11), as shown in Table 5.

Table 5: Results of maternal and infant factors in multiple regression analysis

| Variables    | Category       | Risk Ratio (95% CI) | P value |
|--------------|----------------|---------------------|---------|
| Hypertension | Yes vs No      | 0.88 (0.70, 1.11)   | 0.279   |
| IUGR         | Yes vs No      | 1.88 (1.68, 2.11)   | 0.032   |
| GA (weeks)   | 25-32 vs 33-37 | 3.80 (2.43, 5.96)   | <0.0001 |

GA: gestational age, IUGR: intrauterine growth restriction. CI: confidence interval.

## Discussion:

The prevalence of VLBW infants of all live birth in this single hospital study in the Eastern Cape Province between December 2017 and November 2018 was 5.4%. This figure lies within the prevalence of 3–7% reported worldwide (3,13), but is likely elevated due to the referrals from obstetric units and surrounding district hospitals.

Almost 32% of all admitted VLBW neonates died before discharge. For infants with a birth weight of 1000g or less this number rose to 60%, while the chance for survival of infants weighing 1000g and up to 1500g at birth was higher, with a mortality rate of 18.5%. Thus, the overall mortality rate is higher than the reported average of approximately 25% in major cities in South Africa, (24,36,37) and much higher than in the hospitals with much greater resources from the Western Cape Province (22). It is also much higher than in most hospitals in high-income countries where mortality rates for VLBW infants are as low as 9.5% to 17.2% (14,17–19). The high mortality in our setting is most likely due to the scarcity of skilled health care workers, limited infrastructures, as well as a patient overloaded, resource-restricted system, as described (4). The data support that although South Africa is considered an upper-middle-income country by the World Bank, survival of VLBW varies greatly dependent on resources (22).

Consistent with other studies examining the causes of mortality in VLBW babies, birth weight and low gestational age were predictors of neonatal mortality in our study population (18,23,26,35). Complications of prematurity, such as the development of hyaline membrane disease (HMD) and the associated need for surfactant replacement therapy with ventilation was associated with a significantly increased risk of mortality, as reported in previous research (3,22,23,26). Other studies have shown that CPAP and/or surfactant replacement therapy reduce mortality in VLBW and/or preterm neonates with hyaline membrane disease (22,41). Unavailability of PICU beds and overcrowding in our high care unit with low nurse-infants' ratio could explain why we were unable to find this benefit in our cohort.

Interestingly, our study did not find that the wide range of maternal factors found in other studies increased in-hospital mortality of infants, including lack of antenatal care, maternal primi-parity, mode of delivery or complications thereof (23,27,28,32).

Although a substantial percentage (36%) of the babies were born to HIV infected mothers, and 13.8% (n=8) of those had not received any ART before giving birth, all HIV-PCR done were negative. This is encouraging, but further research is needed to investigate HIV transmission rates in VLBW babies in low resource settings (34,35).

1  
2  
3 There are several limitations to this study. Even though this was a prospective study, data  
4 collection was not exhaustive and some prenatal variables could not be explored due to lack  
5 of information. Also, due to staff shortage, ultrasound of the head was not performed  
6 routinely, but only in clinically suspicious situations, and thus intracranial pathologies might  
7 have been missed. Furthermore, this is a single, large hospital-based study, therefore the  
8 number of VLBW cases is limited.  
9  
10  
11  
12  
13  
14  
15

### 16 **Conclusion**

17 Our cohort shows a higher in-hospital mortality of VLBW infants compared to some other  
18 urban hospitals in South Africa. These findings indicate that the survival of VLBW and  
19 especially ELBW babies are still unacceptably low in this resource restricted public hospital.  
20 This is most likely caused by numerous factors, many of which have also been implicated in  
21 similar studies, but need to be further investigated in future research and appropriately  
22 addressed.  
23  
24  
25  
26  
27  
28  
29  
30  
31  
32  
33  
34  
35  
36  
37  
38  
39  
40  
41

### 42 **Literature:**

- 43 1. De Almeida MFB, Guinsburg R, Martinez FE, Procianoy RS, Leone CR, Marba STM,  
44 et al. Fatores perinatais associados ao óbito precoce em prematuros nascidos nos  
45 centros da Rede Brasileira de Pesquisas Neonatais. *J Pediatr (Rio J)*.  
46 2008;84(4):300–7.  
47
- 48 2. Basu S, Rathore P, Bhatia BD. Predictors of mortality in very low birth weight  
49 neonates in India. *Singapore Med J*. 2008;49(7):556–60.  
50
- 51 3. Afjeh SA, Sabzehei MK, Fallahi M, Esmaili F. Outcome of very low birth weight infants  
52 over 3 years report from an iranian center. *Iran J Pediatr*. 2013;  
53
- 54 4. Rhoda NR, Gebhardt GS, Kauchali S BP. Reducing neonatal deaths in South Africa.  
55 *S Afr Med J*. 2018;3(1):S9–19.  
56  
57  
58  
59  
60



- 1  
2  
3 5. World Health Organization. Newborns: reducing mortality. World Heal Organ  
4 [Internet]. 2019;(September 2019):2018–21. Available from:  
5 <http://www.who.int/mediacentre/factsheets/fs178/en/>  
6  
7
- 8 6. Haas DM. Preterm birth. *BMJ Clin Evid.* 2011;2011(1):1–5.  
9
- 10 7. Velaphi SC, Mokhachane M, Mphahlele RM, Beckh-Arnold E, Kuwanda ML, Cooper  
11 PA. Survival of very-low-birth-weight infants according to birth weight and gestational  
12 age in a public hospital. *South African Med J.* 2005;  
13  
14
- 15 8. Mackay CA, Ballot DE, Cooper PA. Growth of a cohort of very low birth weight infants  
16 in Johannesburg, South Africa. *BMC Pediatr.* 2011;11:2–7.  
17  
18
- 19 9. Martin JA, Hamilton BE, D P, Sutton PD, Ventura SJ, Menacker F, et al. National Vital  
20 Statistics Reports Births : Final Data for 2013. *Statistics (Ber).* 2015;64(1):1–104.  
21  
22
- 23 10. Liu L, Oza S, Hogan D, Chu Y, Perin J, Zhu J, et al. Global, regional, and national  
24 causes of under-5 mortality in 2000–15: an updated systematic analysis with  
25 implications for the Sustainable Development Goals. *Lancet.* 2016;388(10063):3027–  
26 35.  
27  
28
- 29 11. Hahn WH, Chang JY, Chang YS, Shim KS, Bae CW. Recent trends in neonatal  
30 mortality in very low birth weight korean infants: In comparison with Japan and the  
31 USA. *J Korean Med Sci.* 2011;26(4):467–73.  
32  
33
- 34 12. Chung SH, Bae CW. Improvement in the survival rates of very low birth weight infants  
35 after the establishment of the Korean neonatal network: Comparison between the  
36 2000s and 2010s. *J Korean Med Sci.* 2017;  
37  
38
- 39 13. Fanaroff AA, Stoll BJ, Wright LL, Carlo WA, Ehrenkranz RA, Stark AR, et al. Trends in  
40 neonatal morbidity and mortality for very low birthweight infants. *Am J Obstet*  
41 *Gynecol.* 2007;  
42  
43
- 44 14. Chee YY, Wong MSC, Wong RMS, Wong KY. Neonatal outcomes of preterm or very-  
45 low-birth-weight infants over a decade from queen mary hospital, Hong Kong:  
46 Comparison with the vermont oxford network. *Hong Kong Med J.* 2017;  
47  
48
- 49 15. Nayeri F, Emami Z, Mohammadzadeh Y, Shariat M, Sagheb S, Sahebi L. Mortality  
50 and Morbidity Patterns of Very Low Birth Weight Newborns in Eastern Mediterranean  
51 Region: A Meta-Analysis Study. *J Pediatr Rev.* 2018;7(2):67–76.  
52  
53
- 54 16. Bansal A. Comparison of outcome of very-low-birth-weight babies with developed  
55 countries: A prospective longitudinal observational study. *J Clin Neonatol.*  
56  
57  
58  
59  
60

- 2018;7(4):254.
17. Amudha Jayanthi Anand, Karthik Sabapathy, Bhavani Sriram, Victor Samuel Rajadurai PKA. Single Center Outcome of Multiple Births in the Premature and Very Low Birth Weight Cohort in Singapore. *Am J Perinatol*. 2020;Sep.
  18. Chen SD, Lin YC, Lu CL, Chen SCC. Changes in outcome and complication rates of very-low-birth-weight infants in one tertiary center in southern Taiwan between 2003 and 2010. *Pediatr Neonatol* [Internet]. 2014;55(4):291–6. Available from: <http://dx.doi.org/10.1016/j.pedneo.2013.10.010>
  19. Al Hazzani F, Al-Alaiyan S, Hassanein J, Khadawardi E. Short-term outcome of very low-birth-weight infants in a tertiary care hospital in Saudi Arabia. *Ann Saudi Med*. 2011;
  20. Nannan N, Dorrington R, Laubscher R, Zinyakatira N, Prinsloo M, Darikwa T, et al. Under-5 mortality statistics in South Africa: Shedding some light on the trend and causes 1997-2007. South African Medical Research Council. 2012.
  21. Bradshaw D, Dorrington R. Rapid Mortality Surveillance Report 2011. 2012.
  22. Van Wyk L, Tooke L, Dippenaar R, Rhoda N, Lloyd L, Holgate S, et al. Optimal ventilation and surfactant therapy in very-low-birth-weight infants in resource-restricted regions. *Neonatology*. 2020;117(2):217–24.
  23. Kalimba EM, Ballot DE. Survival of extremely low-birth-weight infants. *SAJCH South African J Child Heal*. 2013;7(1):13–6.
  24. Tshehla RM, Chb MB, Sa DCH, Coetzee M, Chb MB, Sa DCH, et al. Mortality and morbidity of very low-birthweight and extremely low-birthweight infants in a tertiary hospital in Tshwane. 2019;13(2).
  25. Terzic S, Heljic S. Assessing mortality risk in very low birth weight infants. *Med Arh*. 2012;66(2):76–9.
  26. S. K, Kumar MS. Morbidity and mortality pattern of very low birth weight infants admitted in SNCU in a South Asian tertiary care centre. *Int J Contemp Pediatr*. 2018;5(3):720–5.
  27. Cupen K, Barran A, Singh V, Dialsingh I. Risk Factors Associated with Preterm Neonatal Mortality: A Case Study Using Data from Mt. Hope Women’s Hospital in Trinidad and Tobago. *Children*. 2017;4(12):108.
  28. Vaahtera M, Kulmala T, Ashorn P, Ndekha M, Cullinan T, Koivisto AM, et al.

- 1  
2  
3 Antenatal and perinatal predictors of infant mortality in rural Malawi. *Arch Dis Child*  
4 *Fetal Neonatal Ed.* 2000;82(3):200–4.  
5  
6  
7 29. Townsend CL, Schulte J, Thorne C, Dominguez KL, Tookey PA, Cortina-Borja M, et  
8 al. Antiretroviral therapy and preterm delivery—a pooled analysis of data from the  
9 United States and Europe. *BJOG An Int J Obstet Gynaecol.* 2010;117(11):1399–410.  
10  
11  
12 30. Van Der Merwe K, Hoffman R, Black V, Chersich M, Coovadia A, Rees H. Birth  
13 outcomes in South African women receiving highly active antiretroviral therapy: A  
14 retrospective observational study. *J Int AIDS Soc [Internet].* 2011;14(1):42. Available  
15 from: <http://www.jiasociety.org/content/14/1/42>  
16  
17  
18  
19 31. Powis KM, Kitch D, Ogwu A, Hughes MD, Lockman S, Leidner J, et al. Increased risk  
20 of preterm delivery among HIV-infected women randomized to protease versus  
21 nucleoside reverse transcriptase inhibitor-based HAART during pregnancy. *J Infect*  
22 *Dis.* 2011;204(4):506–14.  
23  
24  
25  
26 32. Uthman OA, Nachega JB, Anderson J, Kanters S, Mills EJ, Renaud F, et al. Timing of  
27 initiation of antiretroviral therapy and adverse pregnancy outcomes: a systematic  
28 review and meta-analysis. *Lancet HIV.* 2017;4(1):e21–30.  
29  
30  
31  
32 33. González R, Rupérez M, Sevene E, Vala A, Maculuve S, Bulo H, et al. Effects of HIV  
33 infection on maternal and neonatal health in southern Mozambique: A prospective  
34 cohort study after a decade of antiretroviral drugs roll out. *PLoS One.* 2017;12(6):1–  
35 11.  
36  
37  
38  
39 34. John V, Harper K. HIV prevalence at birth in very low-birthweight infants. *South*  
40 *African J Child Heal.* 2020;14(3):129–32.  
41  
42  
43 35. Levin C, Le Roux DM, Harrison MC, Tooke L. HIV Transmission to Premature Very  
44 Low Birth Weight Infants. *Pediatr Infect Dis J.* 2017;  
45  
46  
47 36. Ballot DE, Chirwa T, Ramdin T, Chirwa L, Mare I, Davies VA, et al. Comparison of  
48 morbidity and mortality of very low birth weight infants in a Central Hospital in  
49 Johannesburg between 2006/2007 and 2013. *BMC Pediatr.* 2015;15(1):1–11.  
50  
51  
52 37. Gibbs L, Bch MB, Sa DCH, Paeds M, Sa F, Tooke L, et al. Short-term outcomes of  
53 inborn v . outborn very-low- birth-weight neonates ( < 1 500 g ) in the neonatal nursery  
54 at Groote Schuur Hospital , Cape Town , South Africa. 2017;107(10):900–3.  
55  
56  
57 38. Schindler T, Koller-Smith L, Lui K, Bajuk B, Bolisetty S. Causes of death in very  
58 preterm infants cared for in neonatal intensive care units: A population-based  
59  
60

- 1  
2  
3 retrospective cohort study. *BMC Pediatr.* 2017;17(1):1–9.  
4  
5  
6 39. Numerato D, Fattore G, Tediosi F, Zanini R, Peltola M, Banks H, et al. Mortality and  
7 length of stay of very low birth weight and very preterm infants: A EuroHOPE study.  
8 *PLoS One.* 2015;10(6):1–12.  
9  
10  
11 40. Zile I, Ebela I, Rozenfelde IR. Risk factors associated with neonatal deaths among  
12 very low birth weight infants in Latvia. *Curr Pediatr Res.* 2017;21(1):64–8.  
13  
14  
15 41. Griffin JB, Jobe AH, Rouse D, McClure EM, Goldenberg RL, Kamath-Rayne BD.  
16 Evaluating WHO-recommended interventions for preterm birth: A mathematical model  
17 of the potential reduction of preterm mortality in sub-Saharan Africa. *Glob Heal Sci*  
18 *Pract.* 2019;  
19  
20  
21 42. Yego F, D'Este C, Byles J, Nyongesa P, Williams JS. A case-control study of risk  
22 factors for fetal and early neonatal deaths in a tertiary hospital in Kenya. *BMC*  
23 *Pregnancy Childbirth.* 2014;14(1):1–9.  
24  
25  
26  
27  
28  
29  
30  
31  
32  
33  
34  
35  
36  
37  
38  
39  
40  
41  
42  
43  
44  
45  
46  
47  
48  
49  
50  
51  
52  
53  
54  
55  
56  
57  
58  
59  
60

1  
2  
3  
4  
5  
6  
7  
8  
9  
10  
11  
12  
13  
14  
15  
16  
17  
18  
19  
20  
21  
22  
23  
24  
25  
26  
27  
28  
29  
30  
31  
32  
33  
34  
35  
36  
37  
38  
39  
40  
41  
42  
43  
44  
45  
46  
47  
48  
49  
50  
51  
52  
53  
54  
55  
56  
57  
58  
59  
60

Confidential: For Review Only

1  
2  
3  
4  
5  
6  
7  
8  
9  
10  
11  
12  
13  
14  
15  
16  
17  
18  
19  
20  
21  
22  
23  
24  
25  
26  
27  
28  
29  
30  
31  
32  
33  
34  
35  
36  
37  
38  
39  
40  
41  
42  
43  
44  
45  
46  
47  
48  
49  
50  
51  
52  
53  
54  
55  
56  
57  
58  
59  
60

Confidential: For Review Only

1  
2  
3  
4  
5  
6  
7  
8  
9  
10  
11  
12  
13  
14  
15  
16  
17  
18  
19  
20  
21  
22  
23  
24  
25  
26  
27  
28  
29  
30  
31  
32  
33  
34  
35  
36  
37  
38  
39  
40  
41  
42  
43  
44  
45  
46  
47  
48  
49  
50  
51  
52  
53  
54  
55  
56  
57  
58  
59  
60

Confidential: For Review Only

1  
2  
3  
4  
5  
6  
7  
8  
9  
10  
11  
12  
13  
14  
15  
16  
17  
18  
19  
20  
21  
22  
23  
24  
25  
26  
27  
28  
29  
30  
31  
32  
33  
34  
35  
36  
37  
38  
39  
40  
41  
42  
43  
44  
45  
46  
47  
48  
49  
50  
51  
52  
53  
54  
55  
56  
57  
58  
59  
60

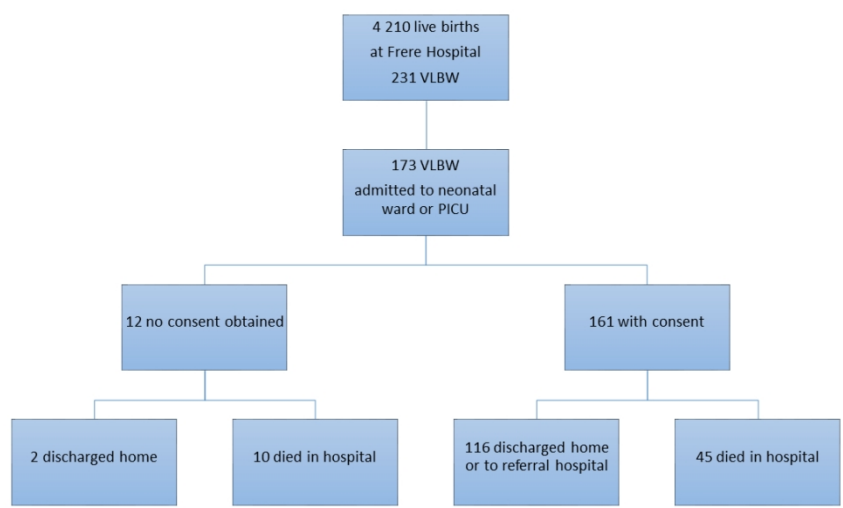



**FNo:****Data of child at birth:**

- 1  
2  
3  
4  
5  
6  
7  
8  
9  
10  
11  
12  
13  
14  
15  
16  
17  
18  
19  
20  
21  
22  
23  
24  
25  
26  
27  
28  
29  
30  
31  
32  
33  
34  
35  
36  
37  
38  
39  
40  
41  
42  
43  
44  
45  
46  
47  
48  
49  
50  
51  
52  
53  
54  
55  
56  
57  
58  
59  
60
- Date of birth:
- Gender  female  male
- Gestational age:
- Mode of delivery:  NVD  Sectio  Vacuum or forceps
- HIV exposed:  exposed  unexposed
- PMTCT  yes  no
- Birth weight: gr
- Length: cm
- Head circumferences: cm
- Resuscitation at birth:  yes  no
- APGAR 1min 5 min 10 min
- Diagnosis at birth:
- Oxygen support  yes  no
- Surfactant:  yes  no
- Ventilatory support:  none  CPAP  Invasive ventilation
- If yes, how long days
- Maximum of oxygen needed:  < 60%  > 60%
- Feeding option  Breast  formula  mixed
- Trend of weight gain:  normal  abnormal
- Sepsis :  yes  no
- PVL or IVH:  yes  no
- PDA:  yes  no
- Steroid use (postnatal):  yes  no
- Resuscitation during hospital stay:  yes  no

## Mother's Data:

Age of mother:

Number of pregnancy: Children alive: Marital status:  married  stable relationship  single

During pregnancy:

Hypertension:  yes  noPT rupture of membranes:  yes  noPreeclampsia/ Eclampsia  yes  no

Any other problems (e.g. seizures, drug abuse, diabetes)

SES of mother:  employed  unemployedElectricity at home:  yes  noRunning water at home:  yes  noFridge:  yes  noEducational level:  primary school  matric  tertiary educationMother's HIV status:  positive  negative

If positive:

ARVs since when: weeks before birth

ARVS:  FDC  second line  other

Disclosure to anyone:

Has partner been tested:

# BMJ Paediatrics Open

## Prospective cohort study of mortality in very low birth weight infants in a single centre in the Eastern Cape Province, South Africa

|                               |                                                                                                                                                                                                                                                                                                                                                                                                                                                           |
|-------------------------------|-----------------------------------------------------------------------------------------------------------------------------------------------------------------------------------------------------------------------------------------------------------------------------------------------------------------------------------------------------------------------------------------------------------------------------------------------------------|
| Journal:                      | <i>BMJ Paediatrics Open</i>                                                                                                                                                                                                                                                                                                                                                                                                                               |
| Manuscript ID                 | bmjpo-2020-000918.R2                                                                                                                                                                                                                                                                                                                                                                                                                                      |
| Article Type:                 | Original research                                                                                                                                                                                                                                                                                                                                                                                                                                         |
| Date Submitted by the Author: | 27-Jan-2021                                                                                                                                                                                                                                                                                                                                                                                                                                               |
| Complete List of Authors:     | Michaelis, Isabel; Walter Sisulu University, Paediatrics<br>Manyisane, Ncomeka; Walter Sisulu University, Paediatrics<br>Krägeloh-Mann, Ingeborg; Eberhard Karls University Tübingen Faculty of Medicine, Children's Hospital, Neuropaediatrics, Developmental Neurology, Social Paediatrics<br>Mazinu, Mikateko; South African Medical Research Council, Biostatistics unit<br>Jordaan, Esme; South African Medical Research Council, Biostatistics unit |
| Keywords:                     | Neonatology, Mortality                                                                                                                                                                                                                                                                                                                                                                                                                                    |
|                               |                                                                                                                                                                                                                                                                                                                                                                                                                                                           |

SCHOLARONE™  
Manuscripts

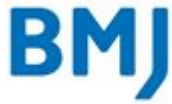

I, the Submitting Author has the right to grant and does grant on behalf of all authors of the Work (as defined in the below author licence), an exclusive licence and/or a non-exclusive licence for contributions from authors who are: i) UK Crown employees; ii) where BMJ has agreed a CC-BY licence shall apply, and/or iii) in accordance with the terms applicable for US Federal Government officers or employees acting as part of their official duties; on a worldwide, perpetual, irrevocable, royalty-free basis to BMJ Publishing Group Ltd ("BMJ") its licensees and where the relevant Journal is co-owned by BMJ to the co-owners of the Journal, to publish the Work in this journal and any other BMJ products and to exploit all rights, as set out in our [licence](#).

The Submitting Author accepts and understands that any supply made under these terms is made by BMJ to the Submitting Author unless you are acting as an employee on behalf of your employer or a postgraduate student of an affiliated institution which is paying any applicable article publishing charge ("APC") for Open Access articles. Where the Submitting Author wishes to make the Work available on an Open Access basis (and intends to pay the relevant APC), the terms of reuse of such Open Access shall be governed by a Creative Commons licence – details of these licences and which [Creative Commons](#) licence will apply to this Work are set out in our licence referred to above.

Other than as permitted in any relevant BMJ Author's Self Archiving Policies, I confirm this Work has not been accepted for publication elsewhere, is not being considered for publication elsewhere and does not duplicate material already published. I confirm all authors consent to publication of this Work and authorise the granting of this licence.

## Title Page

Prospective cohort study of mortality in very low birth weight infants in a single centre in the Eastern Cape Province, South Africa

Isabel Michaelis, MD, PhD, Walter Sisulu University, East London

Ingeborg Krägeloh- Mann, Professor of Paediatrics, Eberhard Karls University of Tübingen, Tübingen

Ncomeka Manyisane, McBCh, FcPaed, Walter Sisulu University, East London

Mikateko Mazinu, MSc Biomathematics, South African Medical Research Council, Tygerberg

Esme Jordaan, MSc Statistics, South African Medical Research Council, Tygerberg and Statistics and Population Studies Department, University of the Western Cape

Corresponding author: Isabel Michaelis, Private Bag 9047, Amalinda Main Road, 5200 East London, Tel: +27 (43) 709 2077, Fax: +27 (43) 709 4065. [isabel.michaelis@ehealth.gov.za](mailto:isabel.michaelis@ehealth.gov.za)

[Key words: neonatology, VLBW, infant mortality, sub Saharan Africa, global health](#)

Word count: 2424 (without tables and abstract)

Dr Isabel Michaelis

1  
2  
3 Prospective cohort study of mortality in very low birth weight infants in a single centre  
4 in the Eastern Cape Province, South Africa  
5  
6  
7

8 Isabel Michaelis, MD, PhD, Walter Sisulu University, East London

9 Ingeborg Krägeloh-Mann, Professor of Paediatrics, Eberhard Karls University of Tübingen, Tübingen

10 Ncomeka Manyisane, McBCh, FcPaed, Walter Sisulu University, East London

11 Mikateko Mazinu, MSc Biomathematics, South African Medical Research Council, Tygerberg

12 Esme Jordaan, MSc Statistics, African Medical Research Council, Tygerberg  
13  
14  
15  
16  
17

18 Contact: isabel.michaelis@echealth.gov.za  
19  
20

21 I hereby confirm that neither the submitted paper nor any parts of it have been published or  
22 submitted anywhere else.  
23

24 There is no conflict of interest. This work was supported by the South African Medical  
25 Research Council (SAMRC) Fund, grant number (086/2017). The sponsorship of the  
26 SAMRC Pilot Grant serves to encourage clinicians in rural South Africa to engage in  
27 research.  
28  
29  
30

31 Dr Isabel Michaelis' contribution consisted of funding acquisition, study design, investigation,  
32 data curation, supervision and drafting the initial manuscript.  
33

34 Dr Ncomeka Manyisane contributed to study design, investigation, data curation and  
35 reviewing the manuscript.  
36

37 Prof Ingeborg Krägeloh-Mann contributed to supervision, writing and reviewing the final  
38 manuscript.  
39

40 Mrs Mikateko Mazinu contributed to data curation and data analysis.

41 Mrs Esme Jordaan contributes to data curation and data analysis and writing and reviewing  
42 the final manuscript.  
43  
44  
45  
46

47 **What is known about this topic?**

48 The perinatal mortality rate in sub-Saharan Africa is about 30 per 1000 live births. Preterm and  
49 VLBW infants account for a large number of neonatal deaths. Although South Africa is  
50 considered an upper-middle-income country by the World Bank, survival of VLBW varies greatly  
51 dependent on resources. Survival of VLBW infants in studies from South Africa are about 75%.  
52  
53

54 **What does this study add?**

55 Survival of VLBW infants fulfilling inclusion criteria for the study was 68%. Survival for VLBW  
56 babies in our setting is lower than in other South African urban settings.  
57  
58  
59  
60

**Background:**

Neonatal mortality is a major contributor worldwide to the number of deaths in children under 5 years of age. The primary objective of this study was to assess the overall mortality rate of babies with a birth weight equal or below 1500g in a neonatal unit at a tertiary hospital in the Eastern Cape Province, South Africa. Furthermore, different maternal and infant related factors for higher mortality were analysed.

**Methods:**

This is a prospective cohort study which included infants admitted to the neonatal wards of the hospital within their first 24 hours of life and with a birth weight equal to or below 1500g. Mothers who consented answered a questionnaire to identify factors for mortality.

**Results:**

173 very low birth weight (VLBW) infants were admitted to the neonatal department between November 2017 and December 2018, of whom 55 died (overall mortality rate 32.0%).

Twenty-three of the 44 infants (53,5%) with a birth weight below 1000g died during admission. One hundred and sixty-one mothers completed the questionnaire and 45 of their babies died.

Main factors associated with mortality were lower gestational age and lower birth weight. Need for ventilator support and sepsis were associated with higher mortality, as were maternal factors such as HIV infection and age below 20 years.

**Conclusion:**

This prospective study looked at survival of very low birth weight babies in an underprivileged part of the Eastern Cape of South Africa. Compared to other public urban hospitals in the country the survival rate remains unacceptably low. Further research is required to find the associated causes and appropriate ways to address these.

## Introduction:

Despite improved survival rates of neonates worldwide, the survival of preterm and low birth weight babies is still a challenge, especially in middle- and low-income countries (1–4).

In 2018, the World Health Organisation (WHO) described a worldwide increase of babies born prematurely over the last two decades. The incidence has been estimated between 5 to 18% of all life births (5,6). The prevalence of babies born with a very low birth weight (VLBW) varies between different countries. For example, in one South African study the prevalence was 3%, while in the USA it lies between 1.23 and 1.43% (7–9). Furthermore, prematurity and low birth weight have been identified as the leading causes of mortality in children less than five years of age (5,10–12). It is also well known that neonatal mortality for VLBW infants varies considerably amongst high- and low-middle income countries: a mortality rate of 15% is found in the United States (13), 20% by the Vermont Oxford network (14), 29.1% in Iran (3), 28.2% in South Korea (11), 32% in the Eastern Mediterranean Region (15), and 24.6% in India (16). Some single centres worldwide show a lower mortality rate with 9.5%, 12.4%, 13.0% and 17.2% in single centres in Singapore, Taiwan, Hong-Kong, Saudi-Arabia, respectively (14,17–19).

In South Africa, neonatal mortality accounted for 32% of the under-5 mortality rate (4,20,21). A recent study illustrated survival rates of VLBW neonates between different hospitals in the Western Cape Province of South Africa as characterized by unrestricted or restricted resources (22). The team found a significant difference with a survival rate of 84.4% and 70.4% respectively (22). Kalimba and Ballot (23) studied the survival rate of extremely low birth weight (ELBW) babies (babies weighing less than 1000g at birth) born between 2006 and 2010 in Johannesburg and found that only 25.6% of babies born with a birth weight of less than 900g survived their hospital stay, with birth weight and gestational age being the strongest predictors for survival. A newer retrospective cross-sectional South African study found an overall survival rate in VLBW babies (500g–1499g) of 75.7% (24).

However, there are also other known contributory factors, which can be divided into infant- or maternal-related risk factors. Examples of neonate-related risk factors studied in the literature include low Apgar scores, hyaline membrane disease (HMD), intubation and mechanical ventilation, sepsis, and hemodynamic instability (25,26). Maternal or obstetric risk factors include eclampsia, alcohol consumption, smoking, low socioeconomic status, scarce antenatal care and human immunodeficiency virus (HIV) infection (18,23,27,28). Several studies suggest an increased risk of premature labour in mothers taking antiretroviral treatment for HIV infection during pregnancy (29–32), while others did not find a relationship (33). This is noteworthy, as 30.8% of pregnant women in South Africa tested



1  
2  
3 positive for HIV in 2015, and are put on treatment as soon as the infection is diagnosed  
4 (34,35).  
5

6  
7 The primary aim of this study was to research neonatal mortality of VLBW infants admitted to  
8 the neonatal unit in a hospital in a mixed urban and rural setting in the Eastern Cape  
9 Province of South Africa. Secondly, the association between death and different maternal  
10 and neonatal factors were explored.  
11  
12  
13

### 14 15 16 **Setting:** 17

18 Frere Hospital is a large (885 beds) public tertiary hospital in East London in the Eastern  
19 Cape Province in South Africa, with a seven-bed paediatric intensive care unit (PICU), which  
20 cares for neonates and paediatric medical and surgical patients. Because of this very limited  
21 PICU access, babies with a weight below 1000g are not provided with invasive ventilatory  
22 support due to poor survival. These babies will receive surfactant if needed and continuous  
23 positive airway pressure (CPAP) ventilation is available for six infants in the high care  
24 neonatal unit, which can cater for 12 infants altogether. This high care ward is constantly  
25 above capacity, often having to care for up to 20 infants, when there is only adequate space  
26 for the above-mentioned 12 neonates. Infants with a birth weight over 1000g will be taken to  
27 PICU and receive invasive ventilation if needed and if space is available for them. Stable  
28 neonates with a weight of more than 1000g are referred to the general nursery ward, where  
29 they receive kangaroo care (KMC) in the ward and, if necessary, intravenous fluids and/or  
30 antibiotics and oxygen. Once clinically stable, off oxygen support, tolerating full enteral feeds  
31 and weighing more than 1500g, infants will be transferred to the KMC ward until mothers are  
32 competent in caring for their baby and the weight has increased to at least 1700 g. Some  
33 stable babies might be transferred to their regional hospital once their weight has reached  
34 1500g.  
35  
36  
37  
38  
39  
40  
41  
42  
43  
44  
45

46 Frere Hospital is the tertiary neonatal and obstetric referral centre for obstetric units and for  
47 surrounding district hospitals in the middle part of the Eastern Cape Province. Some  
48 referrals centres are more than 300 km away. These areas were deprived of adequate  
49 infrastructure during the Apartheid regime and are still one of the most under-resourced and  
50 insufficiently managed parts of South Africa.  
51  
52  
53

### 54 **Materials and Methods:** 55

56 This was a prospective cohort study. All babies born at the hospital, or admitted within the  
57 first 24 hours of life into the neonatal unit, with a birth weight equal or below 1500g and  
58 without any life-threatening malformations were included. Neonates who were admitted to  
59  
60

1  
2  
3 the neonatal ward or PICU beyond 24 hours of life were excluded as it was not possible to  
4 get sufficient information on those mother-infant pairs. Mothers were then approached for  
5 consent to include their data. The recruitment period lasted from December 2017 to  
6  
7 November 2018.  
8  
9

10 The study was approved by the institutional ethics committee (086/2017) and, after receiving  
11 written consent from the mothers, data concerning mother and child during the pre-, peri-  
12 and neonatal period were collected from the maternal and neonatal case records, as well as  
13 from a questionnaire filled in with the mother (see supplements). The babies were followed  
14 up until discharge or death. All babies received standard care during this period, as outlined  
15 above.  
16  
17  
18  
19

20 Gestational age was determined by either an early ultrasound or by applying the Ballard  
21 gestational age scoring system. It is estimated that about 70% of the babies admitted to our  
22 neonatal wards will have had their gestational age assessed by early ultrasound. The  
23 different variables were defined as follows: a persistent ductus arteriosus as identified by  
24 echocardiogram; hyaline membrane disease by the presence respiratory distress; FiO<sub>2</sub>  
25 requirement above 40% followed by a confirmatory blood gas and typical X-ray signs; sepsis  
26 as clinical signs confirmed with a positive blood, urine or cerebrospinal fluid culture and/or  
27 raised C-reactive protein (CRP) taken at least 24 hours apart; normal weight gain was  
28 determined when weight loss after birth did not exceed more than 10% and birth weight was  
29 regained within 10-14 days of life; intracranial haemorrhage (ICH) was diagnosed with  
30 cranial ultrasound, which was only performed in clinically unstable infants with the clinical  
31 suspicion of ICH; resuscitation at birth included mask or invasive ventilation with or without  
32 cardiac compressions and medication.  
33  
34  
35  
36  
37  
38  
39  
40  
41  
42  
43

#### 44 **Patient and Public Involvement:**

45  
46 The patients, being mother-newborn pairs, were not involved in the study design. Every  
47 new-born admitted in our wards during the study period was assessed for inclusion in our  
48 study, no recruitment from the patient's side was necessary. The results of this study are  
49 verbally communicated to the mothers and/or caretakers.  
50  
51  
52  
53  
54

#### 55 **Statistical analysis:**

56  
57 Demographic data is presented as frequencies (percentages) for categorical data, and as  
58 means (SD) for continuous data. To test for association between the outcome variable  
59  
60

1  
2  
3 (mortality) and the predictor variables, a log binomial regression model was used. In order to  
4 investigate the relationship between hypertension and mortality in babies in more detail, a  
5 multiple regression model was used, adjusting for IUGR and gestational age. The standard  
6 for significance for all analyses was a p-value <0.05. Data were analysed using STATA  
7 version 15.  
8  
9  
10

### 11 **Results:**

12  
13  
14 During the study period 4 342 babies were born in the hospital, 4 210 of these were live  
15 births and 231 (5.3%) were born with a birth weight between 500g and 1500g. Of those 231  
16 VLBW infants, only 173 met the inclusion criteria for the study. Of those, 55 died during  
17 admission, resulting in an overall mortality rate of 31.8% (95% CI: 25.2–39.2) for VLBW  
18 infants admitted to our unit.  
19  
20  
21

22  
23 One hundred and sixty-one of the 173 VLBW infants were successfully recruited (caregivers  
24 gave informed consent) during the study period. Forty-five (28.0%) of those babies died  
25 before discharge and 116 (72.0%) were discharged home or referred to a peripheral hospital  
26 if they had reached a weight above 1500 g. Forty-four of the 161 babies were born with a  
27 birth weight below 1000g, of those 23 (53,5%) did not survive until discharge. For an  
28 overview of recruitment and numbers of participants, see Figure 1. All 116 babies  
29 discharged from hospital received a follow-up date for the high-risk clinic.  
30  
31  
32  
33  
34  
35

### 36 **Demographics:**

37  
38  
39 The maternal age ranged between 14 and 46 years. Fifty-eight (36.0%) mothers had HIV  
40 infection diagnosed before or during pregnancy, or at birth. Thirty-nine of them (67.2%) had  
41 been on antiretroviral (ARV) treatment at delivery for more than 4 weeks. Sixteen (27.6%)  
42 mothers had been on ARV treatment for less than 4 weeks or were not on treatment at all  
43 when giving birth, and their babies were thus considered at high risk for HIV transmission  
44 and treated accordingly. For other variables please see Table 1.  
45  
46  
47

48  
49 Of the 161 babies included in the study, 96 were female (59.7%). Almost all HIV exposed  
50 babies (n=58) tested negative for HIV infection at birth with a negative birth HIV-polymerase  
51 chain reaction (HIV-PCR) (n=55; 94.8%). Three babies, who died a few hours after birth, did  
52 not receive an HIV-PCR at birth and their status is therefore unknown. For other variables  
53 please see Table 2.  
54  
55  
56  
57  
58  
59  
60

Table 1: Maternal demographic variables

| Variables             | Category                    | Overall*<br>n =161 (%) | Neonates who died **<br>N=45 (%) |
|-----------------------|-----------------------------|------------------------|----------------------------------|
| Age of mother (years) | ≤20                         | 30 (18.6)              | 10 (33.3)                        |
|                       | >20                         | 131 (81.4)             | 35 (26.7)                        |
| Marital status        | Married/stable relationship | 91 (57.6)              | 24 (26.4)                        |
|                       | No partner                  | 67 (42.4)              | 18 (26.8)                        |
| Substance abuse       | Yes                         | 13 (8.1)               | 4 (30.8)                         |
|                       | No                          | 147 (91.9)             | 40 (27.2)                        |
| Employment            | Yes                         | 24 (15.1)              | 5 (20.8)                         |
|                       | No                          | 135 (84.9)             | 39 (28.9)                        |
| Electricity at home   | Yes                         | 143 (89.9)             | 41 (28.7)                        |
|                       | No                          | 16 (10.1)              | 3 (18.8)                         |
| Running water at home | Yes                         | 99 (62.3)              | 28 (28.3)                        |
|                       | No                          | 60 (37.7)              | 16 (26.7)                        |
| Refrigerator at home  | Yes                         | 109 (68.6)             | 32 (29.4)                        |
|                       | No                          | 50 (31.5)              | 12 (24.0)                        |
| Education level       | Primary                     | 72 (45.6)              | 22 (30.6)                        |
|                       | Secondary/tertiary          | 86 (54.4)              | 21 (24.4)                        |
| HIV-infection         | Yes                         | 58 (36.5)              | 14 (24.1)                        |
|                       | No                          | 101 (63.5)             | 30 (29.7)                        |
| ARTs                  | FDC                         | 45 (93.8)              | 10 (22.2)                        |
|                       | Second line                 | 2 (4.2)                | 0 (0.0)                          |
|                       | Other                       | 1 (2.1)                | 0 (0.0)                          |

\*The overall number and percentage per risk factor

\*\*The number and percentage of babies who died per risk factor category.

HIV: human immunodeficiency virus, ART: antiretroviral treatment, FDC: fixed dose combination.

Table 2: Infant demographics variables

| Variables              | Category     | Overall*<br>n =161 (%) | Neonates who died **<br>N=45 (%) |
|------------------------|--------------|------------------------|----------------------------------|
| Gender                 | Female       | 96 (59.6)              | 27 (28.1)                        |
|                        | Male         | 65 (40.4)              | 18 (27.7)                        |
| GA (weeks)             | 25-32        | 78 (49.1)              | 36 (46.2)                        |
|                        | 33-37        | 81 (50.9)              | 9 (11.1)                         |
| HIV exposed            | Yes          | 58 (36.0)              | 14 (24.1)                        |
|                        | No           | 103 (64.0)             | 31 (30.1)                        |
| PMTCT                  | Yes          | 44 (27.3)              | 11 (25.0)                        |
|                        | No           | 117 (72.7)             | 34 (29.1)                        |
| Birth weight (g)       | ≤1000g       | 43 (26.7)              | 23 (53.5)                        |
|                        | >1000g       | 118 (73.3)             | 22 (18.6)                        |
| Born before arrival    | Yes          | 11 (6.8)               | 2 (18.2)                         |
|                        | No           | 150 (93.2)             | 43 (28.7)                        |
| Mother not been to ANC | Yes (no ANC) | 25 (15.5)              | 8 (32.0)                         |

|      |                   |            |           |
|------|-------------------|------------|-----------|
|      | No (ANC attended) | 136 (84.5) | 37 (27.2) |
| IUGR | Yes               | 111 (69.8) | 23 (20.7) |
|      | No                | 48 (30.2)  | 21 (43.8) |

\*The overall number and percentage per risk factor

\*\*The number and percentage of babies who died per risk factor category.

GA: gestational age, HIV: human immunodeficiency virus, PMTCT: prevention of mother to child transmission, IUGR: intrauterine growth restriction.

## Factors associated with in hospital mortality:

### Maternal associated factors for the univariate model:

Univariate regression analysis was used to examine the association between mortality and associated individual factors. Associated factors of infants dying while still in hospital were higher in babies of teenage mothers, mothers with illnesses and mothers on medication. Maternal hypertension and preeclampsia were associated with decreased mortality in the babies. Education level of the mother and other socio-economic status factors were not significantly related to a higher mortality risk during admission in our study, with employment status only showing a trend towards significance (Table 3).

Table 3: Significant univariate associations between VLBW infant mortality and maternal-related factors.

| Variables             | Category   | Risk Ratio (95% CI) | P value |
|-----------------------|------------|---------------------|---------|
| Age of mother (years) | ≤20 vs >20 | 1.25 (1.07- 1.45)   | <0.01   |
| Hypertension          | Yes vs no  | 0.62 (0.49 - 0.77)  | <0.01   |
| Pre-eclampsia         | Yes vs no  | 0.69 (0.57 - 0.82)  | <0.01   |
| Other illnesses       | Yes vs no  | 1.34 (1.04 - 1.74)  | 0.02    |
| Medication            | Yes vs no  | 0.43 (0.25 - 0.77)  | <0.01   |
| Employment            | Yes vs no  | 0.72 (0.52 - 1.01)  | 0.06    |
| Fridge                | Yes vs no  | 1.22 (1.01 - 1.48)  | 0.04    |

Other illnesses included malignancies, epilepsy, mental health disorders. Medication included all other medication besides antiretroviral treatment. CI: confidence interval. Most maternal factors that were not significantly associated with mortality in the regression analysis are not shown in this table.

### Neonatal-associated factors:

There were many significant neonatal-associated factors related to infant mortality, such as low gestational age ( $p < 0.01$ ), low birth weight ( $p < 0.01$ ), IUGR ( $p < 0.01$ ), and the need for

resuscitation at birth ( $p < 0.01$ ) or during hospital stay ( $p = 0.01$ ). Male gender was not associated with higher mortality risk ( $p = 0.94$ ;  $RR = 1.0$ ;  $95\% \text{ CI: } 0.7-1.5$ ) (Table 4).

Table 4: Significant univariate associations between infant mortality and infant-related factors of VLBW infants

| Variables                 | Category          | Risk Ratio (95% CI) | P value |
|---------------------------|-------------------|---------------------|---------|
| Gender                    | Female vs Male    | 1.02 (0.70, 1.48)   | 0.94    |
| GA (weeks)                | 25-32 vs 33-37    | 4.15 (2.93, 5.88)   | <0.01   |
| HIV exposed               | No vs yes         | 1.25 (1.00, 1.56)   | 0.05    |
| Birth weight (g)          | ≤1000 vs >1000    | 2.87 (2.08, 3.96)   | <0.01   |
| IUGR                      | Yes vs no         | 0.47 (0.35, 0.65)   | <0.01   |
| Resuscitation at birth    | Yes vs no         | 4.45 (3.43, 5.78)   | <0.01   |
| Apgar 1 min               | 0-6 vs 7-10       | 2.46 (1.99, 3.05)   | <0.01   |
| Apgar 5 min.              | 0-6 vs 7-10       | 2.42 (2.12, 2.77)   | <0.01   |
| HMD                       | Yes vs no         | 2.03 (1.72, 2.38)   | <0.01   |
| Other                     | Yes vs no         | 1.59 (1.20, 2.09)   | 0.01    |
| Oxygen support            | Yes vs no         | 9.68 (7.39, 12.68)  | <0.01   |
| Days on oxygen            | 0-1 day vs >1 day | 1.44 (0.94, 2.21)   | 0.09    |
| Surfactant given          | Yes vs no         | 3.59 (2.77, 4.65)   | <0.01   |
| Weight gain               | Yes vs no         | 3.39 (2.21, 5.19)   | <0.01   |
| Sepsis                    | Yes vs no         | 6.41 (3.78, 10.88)  | <0.01   |
| ICH                       | Yes vs no         | 5.19 (3.03, 8.90)   | <0.01   |
| PDA                       | No vs yes         | 2.83 (1.47, 5.47)   | <0.01   |
| Resuscitation needed stay | Yes vs no         | 12.31 (5.85, 25.88) | 0.01    |

GA: gestational age, HIV: human immunodeficiency virus, IUGR: intrauterine growth restriction, HMD: hyaline membrane disease, ICH: intracranial haemorrhage, PDA: persistent ductus arteriosus, ANC: antenatal clinic, Other: other problems like neonatal jaundice, hypoglycaemia, necrotizing enterocolitis, hypothermia. CI: confidence interval. Infant-related factors that were not significantly associated with mortality in the univariate regression analysis are not shown in this table, besides gender.

### Multiple regression analysis

As could be seen in the univariate analysis, maternal hypertension was associated with decreased mortality in the babies. However, when adjusting for IUGR and gestational age in the multiple regression analysis, no significant association was found for maternal hypertension ( $p = 0.28$ ;  $RR = 0.88$ ;  $95\% \text{ CI: } 0.70-1.11$ ), as shown in Table 5.

Table 5: Results of maternal and infant factors in multiple regression analysis

| Variables    | Category       | Risk Ratio (95% CI) | P value |
|--------------|----------------|---------------------|---------|
| Hypertension | Yes vs No      | 0.88 (0.70, 1.11)   | 0.28    |
| IUGR         | Yes vs No      | 1.88 (1.68, 2.11)   | 0.03    |
| GA (weeks)   | 25-32 vs 33-37 | 3.80 (2.43, 5.96)   | <0.01   |

GA: gestational age, IUGR: intrauterine growth restriction. CI: confidence interval.

## Discussion:

The prevalence of VLBW infants of all live birth in this single hospital study in the Eastern Cape Province between December 2017 and November 2018 was 5.4%. This figure lies within the prevalence of 3–7% reported worldwide (3,13), but is likely elevated due to the referrals from obstetric units and surrounding district hospitals.

Almost 32% of all admitted VLBW neonates died before discharge. For infants with a birth weight of 1000g or less this number rose to 60%, while the chance for survival of infants weighing 1000g and up to 1500g at birth was higher, with a mortality rate of 18.5%. Thus, the overall mortality rate is higher than the reported average of approximately 25% in major cities in South Africa, (24,36,37) and much higher than in the hospitals with much greater resources from the Western Cape Province (22). It is also much higher than in most hospitals in high-income countries where mortality rates for VLBW infants are as low as 9.5% to 17.2% (14,17–19,38,39). The high mortality in our setting is most likely due to the scarcity of skilled health care workers, limited infrastructures, as well as a patient overloaded, resource-restricted system, as described (4). The data supports that although South Africa is considered an upper-middle-income country by the World Bank, survival of VLBW varies greatly dependent on resources (22).

Consistent with other studies examining the causes of mortality in VLBW babies, birth weight and low gestational age were predictors of neonatal mortality in our study population (18,23,26,35). Complications of prematurity, such as the development of hyaline membrane disease (HMD) and the associated need for surfactant replacement therapy with ventilation was associated with a significantly increased risk of mortality, as reported in previous research (3,22,23,26). Other studies have shown that CPAP and/or surfactant replacement therapy reduce mortality in VLBW and/or preterm neonates with hyaline membrane disease (22,40). Unavailability of PICU beds and overcrowding in our high care unit with low nurse-infants' ratio could explain why we were unable to find this benefit in our cohort.

Interestingly, our study did not find that the wide range of maternal factors found in other studies increasing in-hospital mortality of infants, including lack of antenatal care, maternal primi-parity, mode of delivery or complications thereof (23,27,28,32).

Although a substantial percentage (36%) of the babies were born to HIV infected mothers, and 13.8% (n=8) of those had not received any ART before giving birth, all HIV-PCR done were negative. This is encouraging, but further research is needed to investigate HIV transmission rates in VLBW babies in low resource settings (34,35).

1  
2  
3 There are several limitations to this study. Even though this was a prospective study, data  
4 collection was not exhaustive and some prenatal variables could not be explored due to lack  
5 of information. Also, due to staff shortage, ultrasound of the head was not performed  
6 routinely, but only in clinically suspicious situations, and thus intracranial pathologies might  
7 have been missed. Furthermore, this is a single hospital-based study, therefore the number  
8 of VLBW cases is limited.  
9  
10  
11  
12  
13  
14  
15

### 16 **Conclusion**

17 Our cohort shows a higher in-hospital mortality of VLBW infants compared to some other  
18 urban hospitals in South Africa. These findings indicate that the survival of VLBW and  
19 especially ELBW babies are still unacceptably low in this resource restricted public hospital.  
20 This is most likely caused by numerous factors, many of which have also been implicated in  
21 similar studies, but need to be further investigated in future research and appropriately  
22 addressed.  
23  
24  
25  
26  
27  
28  
29  
30  
31  
32  
33  
34  
35  
36  
37

### 38 **Literature:**

- 39 1. De Almeida MFB, Guinsburg R, Martinez FE, Procianoy RS, Leone CR, Marba STM,  
40 et al. Fatores perinatais associados ao óbito precoce em prematuros nascidos nos  
41 centros da Rede Brasileira de Pesquisas Neonatais. *J Pediatr (Rio J)*.  
42 2008;84(4):300–7.  
43  
44
- 45 2. Basu S, Rathore P, Bhatia BD. Predictors of mortality in very low birth weight  
46 neonates in India. *Singapore Med J*. 2008;49(7):556–60.  
47  
48
- 49 3. Afjeh SA, Sabzehei MK, Fallahi M, Esmaili F. Outcome of very low birth weight infants  
50 over 3 years report from an Iranian center. *Iran J Pediatr*. 2013;  
51  
52
- 53 4. Rhoda NR, Gebhardt GS, Kauchali S BP. Reducing neonatal deaths in South Africa.  
54 *S Afr Med J*. 2018;3(1):S9–19.  
55  
56
- 57 5. World Health Organization. Newborns: reducing mortality. World Heal Organ  
58  
59  
60



- 1  
2  
3 [Internet]. 2019;(September 2019):2018–21. Available from:  
4 <http://www.who.int/mediacentre/factsheets/fs178/en/>  
5  
6
- 7 6. Haas DM. Preterm birth. *BMJ Clin Evid.* 2011;2011(1):1–5.  
8
  - 9 7. Velaphi SC, Mokhachane M, Mphahlele RM, Beckh-Arnold E, Kuwanda ML, Cooper  
10 PA. Survival of very-low-birth-weight infants according to birth weight and gestational  
11 age in a public hospital. *South African Med J.* 2005;  
12  
13
  - 14 8. Mackay CA, Ballot DE, Cooper PA. Growth of a cohort of very low birth weight infants  
15 in Johannesburg, South Africa. *BMC Pediatr.* 2011;11:2–7.  
16  
17
  - 18 9. Martin JA, Hamilton BE, D P, Sutton PD, Ventura SJ, Menacker F, et al. National Vital  
19 Statistics Reports Births : Final Data for 2013. *Statistics (Ber).* 2015;64(1):1–104.  
20  
21
  - 22 10. Liu L, Oza S, Hogan D, Chu Y, Perin J, Zhu J, et al. Global, regional, and national  
23 causes of under-5 mortality in 2000–15: an updated systematic analysis with  
24 implications for the Sustainable Development Goals. *Lancet.* 2016;388(10063):3027–  
25  
26  
27  
28  
29
  - 30 11. Hahn WH, Chang JY, Chang YS, Shim KS, Bae CW. Recent trends in neonatal  
31 mortality in very low birth weight korean infants: In comparison with Japan and the  
32 USA. *J Korean Med Sci.* 2011;26(4):467–73.  
33  
34
  - 35 12. Chung SH, Bae CW. Improvement in the survival rates of very low birth weight infants  
36 after the establishment of the Korean neonatal network: Comparison between the  
37 2000s and 2010s. *J Korean Med Sci.* 2017;  
38  
39
  - 40 13. Fanaroff AA, Stoll BJ, Wright LL, Carlo WA, Ehrenkranz RA, Stark AR, et al. Trends in  
41 neonatal morbidity and mortality for very low birthweight infants. *Am J Obstet*  
42 *Gynecol.* 2007;  
43  
44
  - 45 14. Chee YY, Wong MSC, Wong RMS, Wong KY. Neonatal outcomes of preterm or very-  
46 low-birth-weight infants over a decade from queen mary hospital, Hong Kong:  
47 Comparison with the vermont oxford network. *Hong Kong Med J.* 2017;  
48  
49
  - 50 15. Nayeri F, Emami Z, Mohammadzadeh Y, Shariat M, Sagheb S, Sahebi L. Mortality  
51 and Morbidity Patterns of Very Low Birth Weight Newborns in Eastern Mediterranean  
52 Region: A Meta-Analysis Study. *J Pediatr Rev.* 2018;7(2):67–76.  
53  
54  
55
  - 56 16. Bansal A. Comparison of outcome of very-low-birth-weight babies with developed  
57 countries: A prospective longitudinal observational study. *J Clin Neonatol.*  
58 2018;7(4):254.  
59  
60

17. Amudha Jayanthi Anand, Karthik Sabapathy, Bhavani Sriram, Victor Samuel Rajadurai PKA. Single Center Outcome of Multiple Births in the Premature and Very Low Birth Weight Cohort in Singapore. *Am J Perinatol*. 2020;Sep.
18. Chen SD, Lin YC, Lu CL, Chen SCC. Changes in outcome and complication rates of very-low-birth-weight infants in one tertiary center in southern Taiwan between 2003 and 2010. *Pediatr Neonatol* [Internet]. 2014;55(4):291–6. Available from: <http://dx.doi.org/10.1016/j.pedneo.2013.10.010>
19. Al Hazzani F, Al-Alaiyan S, Hassanein J, Khadawardi E. Short-term outcome of very low-birth-weight infants in a tertiary care hospital in Saudi Arabia. *Ann Saudi Med*. 2011;
20. Nannan N, Dorrington R, Laubscher R, Zinyakatira N, Prinsloo M, Darikwa T, et al. Under-5 mortality statistics in South Africa: Shedding some light on the trend and causes 1997-2007. South African Medical Research Council. 2012.
21. Bradshaw D, Dorrington R. Rapid Mortality Surveillance Report 2011. 2012.
22. Van Wyk L, Tooke L, Dippenaar R, Rhoda N, Lloyd L, Holgate S, et al. Optimal ventilation and surfactant therapy in very-low-birth-weight infants in resource-restricted regions. *Neonatology*. 2020;117(2):217–24.
23. Kalimba EM, Ballot DE. Survival of extremely low-birth-weight infants. *SAJCH South African J Child Heal*. 2013;7(1):13–6.
24. Tshehla RM, Chb MB, Sa DCH, Coetzee M, Chb MB, Sa DCH, et al. Mortality and morbidity of very low-birthweight and extremely low-birthweight infants in a tertiary hospital in Tshwane. 2019;13(2).
25. Terzic S, Heljic S. Assessing mortality risk in very low birth weight infants. *Med Arh*. 2012;66(2):76–9.
26. S. K, Kumar MS. Morbidity and mortality pattern of very low birth weight infants admitted in SNCU in a South Asian tertiary care centre. *Int J Contemp Pediatr*. 2018;5(3):720–5.
27. Cupen K, Barran A, Singh V, Dialsingh I. Risk Factors Associated with Preterm Neonatal Mortality: A Case Study Using Data from Mt. Hope Women's Hospital in Trinidad and Tobago. *Children*. 2017;4(12):108.
28. Vaahtera M, Kulmala T, Ashorn P, Ndekha M, Cullinan T, Koivisto AM, et al. Antenatal and perinatal predictors of infant mortality in rural Malawi. *Arch Dis Child*

- 1  
2  
3 Fetal Neonatal Ed. 2000;82(3):200–4.  
4  
5  
6 29. Townsend CL, Schulte J, Thorne C, Dominguez KL, Tookey PA, Cortina-Borja M, et  
7 al. Antiretroviral therapy and preterm delivery-a pooled analysis of data from the  
8 United States and Europe. *BJOG An Int J Obstet Gynaecol.* 2010;117(11):1399–410.  
9  
10  
11 30. Van Der Merwe K, Hoffman R, Black V, Chersich M, Coovadia A, Rees H. Birth  
12 outcomes in South African women receiving highly active antiretroviral therapy: A  
13 retrospective observational study. *J Int AIDS Soc [Internet].* 2011;14(1):42. Available  
14 from: <http://www.jiasociety.org/content/14/1/42>  
15  
16  
17 31. Powis KM, Kitch D, Ogwu A, Hughes MD, Lockman S, Leidner J, et al. Increased risk  
18 of preterm delivery among HIV-infected women randomized to protease versus  
19 nucleoside reverse transcriptase inhibitor-based HAART during pregnancy. *J Infect*  
20 *Dis.* 2011;204(4):506–14.  
21  
22  
23 32. Uthman OA, Nachega JB, Anderson J, Kanters S, Mills EJ, Renaud F, et al. Timing of  
24 initiation of antiretroviral therapy and adverse pregnancy outcomes: a systematic  
25 review and meta-analysis. *Lancet HIV.* 2017;4(1):e21–30.  
26  
27  
28 33. González R, Rupérez M, Sevene E, Vala A, Maculuve S, Bulo H, et al. Effects of HIV  
29 infection on maternal and neonatal health in southern Mozambique: A prospective  
30 cohort study after a decade of antiretroviral drugs roll out. *PLoS One.* 2017;12(6):1–  
31 11.  
32  
33  
34 34. John V, Harper K. HIV prevalence at birth in very low-birthweight infants. *South*  
35 *African J Child Heal.* 2020;14(3):129–32.  
36  
37  
38 35. Levin C, Le Roux DM, Harrison MC, Tooke L. HIV Transmission to Premature Very  
39 Low Birth Weight Infants. *Pediatr Infect Dis J.* 2017;  
40  
41  
42 36. Ballot DE, Chirwa T, Ramdin T, Chirwa L, Mare I, Davies VA, et al. Comparison of  
43 morbidity and mortality of very low birth weight infants in a Central Hospital in  
44 Johannesburg between 2006/2007 and 2013. *BMC Pediatr.* 2015;15(1):1–11.  
45  
46  
47 37. Gibbs L, Bch MB, Sa DCH, Paeds M, Sa F, Tooke L, et al. Short-term outcomes of  
48 inborn v . outborn very-low- birth-weight neonates ( < 1 500 g ) in the neonatal nursery  
49 at Groote Schuur Hospital , Cape Town , South Africa. 2017;107(10):900–3.  
50  
51  
52 38. Numerato D, Fattore G, Tediosi F, Zanini R, Peltola M, Banks H, et al. Mortality and  
53 length of stay of very low birth weight and very preterm infants: A EuroHOPE study.  
54 *PLoS One.* 2015;10(6):1–12.  
55  
56  
57  
58  
59  
60

- 1  
2  
3 39. Zile I, Ebela I, Rozenfelde IR. Risk factors associated with neonatal deaths among  
4 very low birth weight infants in Latvia. *Curr Pediatr Res.* 2017;21(1):64–8.  
5  
6  
7 40. Griffin JB, Jobe AH, Rouse D, McClure EM, Goldenberg RL, Kamath-Rayne BD.  
8 Evaluating WHO-recommended interventions for preterm birth: A mathematical model  
9 of the potential reduction of preterm mortality in sub-Saharan Africa. *Glob Heal Sci*  
10 *Pract.* 2019;  
11  
12  
13  
14  
15  
16  
17  
18  
19  
20  
21  
22  
23  
24  
25  
26  
27  
28  
29  
30  
31  
32  
33  
34  
35  
36  
37  
38  
39  
40  
41  
42  
43  
44  
45  
46  
47  
48  
49  
50  
51  
52  
53  
54  
55  
56  
57  
58  
59  
60

Confidential: For Review Only

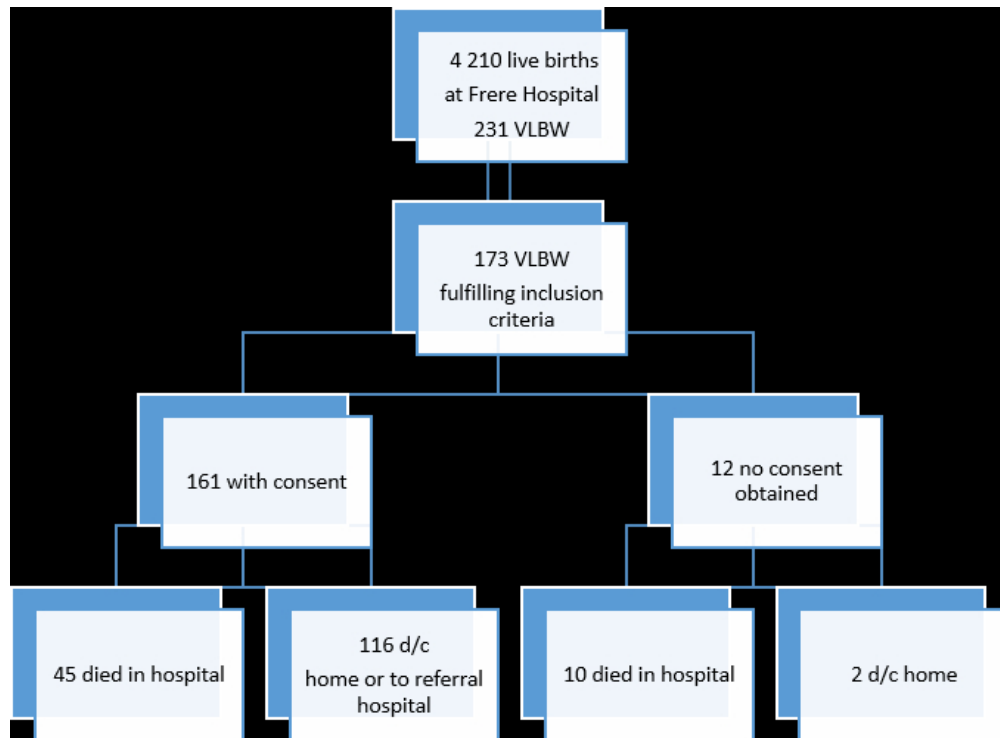

**FNo:****Data of child at birth:**

- 1  
2  
3  
4  
5  
6  
7 Date of birth:
- 8  
9 Gender  female  male
- 10  
11 Gestational age:
- 12  
13 Mode of delivery:  NVD  Sectio  Vacuum or forceps
- 14  
15 HIV exposed:  exposed  unexposed
- 16  
17 PMTCT  yes  no
- 18  
19 Birth weight: gr
- 20  
21 Length: cm
- 22  
23 Head circumferences: cm
- 24  
25 Resuscitation at birth:  yes  no
- 26  
27 APGAR 1min 5 min 10 min
- 28  
29 Diagnosis at birth:
- 30  
31 Oxygen support  yes  no
- 32  
33 Surfactant:  yes  no
- 34  
35 Ventilatory support:  none  CPAP  Invasive ventilation
- 36  
37 If yes, how long days
- 38  
39 Maximum of oxygen needed:  < 60%  > 60%
- 40  
41 Feeding option  Breast  formula  mixed
- 42  
43 Trend of weight gain:  normal  abnormal
- 44  
45 Sepsis :  yes  no
- 46  
47 PVL or IVH:  yes  no
- 48  
49 PDA:  yes  no
- 50  
51 Steroid use (postnatal):  yes  no
- 52  
53 Resuscitation during hospital stay:  yes  no
- 54  
55  
56  
57  
58  
59  
60

1  
2  
3 Mother's Data:  
4  
5  
67 Age of mother:  
89 Number of pregnancy: 10 Children alive: 11 Marital status:  married  stable relationship  single  
12  
1314 During pregnancy:  
1516 Hypertension:  yes  no  
1718 PT rupture of membranes:  yes  no  
1920 Preeclampsia/ Eclampsia  yes  no  
2122 Any other problems (e.g. seizures, drug abuse, diabetes)  
2324 SES of mother:  employed  unemployed  
2526 Electricity at home:  yes  no  
2728 Running water at home:  yes  no  
2930 Fridge:  yes  no  
3132 Educational level:  primary school  matric  tertiary education  
3334 Mother's HIV status:  positive  negative  
3536 If positive:  
3738 ARVs since when: weeks before birth  
3940 ARVS:  FDC  second line  other  
4142 Disclosure to anyone:  
4344 Has partner been tested:  
45  
46  
47  
48  
49  
50  
51  
52  
53  
54  
55  
56  
57  
58  
59  
60
