# Supplementary material for: Prospective cohort study of mortality in very low birthweight infants in a single centre in the Eastern Cape province, South Africa
Source: PubMed Central journal article supplement — BMJ Paediatr Open. 2021 Feb 17;5(1):e000918. doi: 10.1136/bmjpo-2020-000918 (PMC7893654; doi:10.1136/bmjpo-2020-000918), 2021-02-17
Supplement: bmjpo-2020-000918supp001.pdf [file bmjpo-2020-000918supp001.pdf]

**FNo:****Data of child at birth:**

- Date of birth:
- Gender  female  male
- Gestational age:
- Mode of delivery:  NVD  Sectio  Vacuum or forceps
- HIV exposed:  exposed  unexposed
- PMTCT  yes  no
- Birth weight: gr
- Length: cm
- Head circumferences: cm
- Resuscitation at birth:  yes  no
- APGAR 1min 5 min 10 min
- Diagnosis at birth:
- Oxygen support  yes  no
- Surfactant:  yes  no
- Ventilatory support:  none  CPAP  Invasive ventilation
- If yes, how long days
- Maximum of oxygen needed:  < 60%  > 60%
- Feeding option  Breast  formula  mixed
- Trend of weight gain:  normal  abnormal
- Sepsis :  yes  no
- PVL or IVH:  yes  no
- PDA:  yes  no
- Steroid use (postnatal):  yes  no
- Resuscitation during hospital stay:  yes  no

## Mother's Data:

Age of mother:

Number of pregnancy: Children alive: Marital status:  married  stable relationship  single

During pregnancy:

Hypertension:  yes  noPT rupture of membranes:  yes  noPreeclampsia/ Eclampsia  yes  no

Any other problems (e.g. seizures, drug abuse, diabetes)

SES of mother:  employed  unemployedElectricity at home:  yes  noRunning water at home:  yes  noFridge:  yes  noEducational level:  primary school  matric  tertiary educationMother's HIV status:  positive  negative

If positive:

ARVs since when: weeks before birth

ARVS:  FDC  second line  other

Disclosure to anyone:

Has partner been tested:
